# Supplementary material for: Dietary Impact of Adding Potassium Chloride to Foods as a Sodium Reduction Technique
Source: Nutrients. 2016 Apr 21;8(4):235. doi: 10.3390/nu8040235 (PMC4848703; doi:10.3390/nu8040235)
Supplement: Supplementary file 1 [file nutrients-08-00235-s001.xlsx]

## Sheet: Sheet1
food_code	food_name	group_name	Adaptable food
1002pv1	Ice cream dairy Delight Line wo ad sugar	Snacks	Y
1008pv1	Dairy dessert with cream averaged	Milk products	Y
1010pv1	Figs fresh	Fresh fruit & vegetables	N
1013pv1	Bread crumbs	Grains and cereals	Y
1014pv1	Rice brown boiled	Processed potatoe, pasta, rice	N
1017pv1	Bread wheatrye wholemeal	Bread	Y
1020pv1	Flour wheat self-raising	Grains and cereals	Y
1021pv1	Artichoke raw	Fresh fruit & vegetables	N
1021pv1.11111111111111	Artichoke raw	Fresh fruit & vegetables	N
1023pv1	Flour rice instant Bambix	Breakfast cereals	Y
1025pv1	Yeast dried	All other products	Y
1048pv1	Pd Nutridrink Protein p 100 ml	All other products	Y
1056pv1	Kiwi fruit	Fresh fruit & vegetables	N
1056pv1.11111111111111	Kiwi fruit	Fresh fruit & vegetables	N
1057pv1	Kaki / Sharon fruit	Fresh fruit & vegetables	N
1065pv1	Preparation glucose powder Dextro-M	All other products	Y
106pv1.66666666666667	Duck whole raw	Fresh meat	N
1074pv1	Passion fruit	Fresh fruit & vegetables	N
107pv1.42857142857143	Hare whole raw	Fresh meat	N
1088pv1	Sweetener p tablet Natrena	All other products	Y
1089pv1	Sweetener liquid p drop Natrena	All other products	Y
108pv1	Chicken with skin raw	Fresh meat	N
108pv1.33333333333333	Chicken with skin raw	Fresh meat	N
108pv1.42857142857143	Chicken with skin raw	Fresh meat	N
1090pv1	Lychees	Fresh fruit & vegetables	N
1094pv1	Vegetable paste Tartex	All other products	Y
1095pv1	Peas chick boiled	Processed fruit & vegetables	N
1096pv1	Salmon smoked	Processed fish products	Y
1097pv1	Caviar/cod roe	Processed fish products	Y
109pv1.33333333333333	Rabbit domesticated raw	Fresh meat	N
109pv1.47058823529412	Rabbit domesticated raw	Fresh meat	N
1100pv1	Herring pickled (sweet)sour	Processed fish products	Y
1101pv1	Snails	Processed meat products	Y
1103pv1	Cheese spread 30+	Cheese -products	Y
1104pv1	Cheese smoked	Cheese -products	Y
1105pv1	Melon water	Beverages	Y
1106pv1	Melon honeydew	Fresh fruit & vegetables	N
1108pv1	Cheese Rambol	Cheese -products	Y
1110pv1	Cheese Stilton	Cheese -products	Y
1111pv1	Cheese Camembert 30+	Cheese -products	Y
1112pv1	Cheese raw milk 48+	Cheese -products	Y
1113pv1	Cheese sodium reduced 48+	Cheese -products	Y
1114pv0.555555555555556	Plantain raw	Fresh fruit & vegetables	N
1114pv1.11111111111111	Plantain raw	Fresh fruit & vegetables	N
1116pv1	Melon in syrup canned	Processed fruit & vegetables	Y
1116pv1.11111111111111	Melon in syrup canned	Processed fruit & vegetables	Y
111pv1	Mussels boiled	Processed fish products	Y
1127pv1	Juice lemon	Juice	Y
1131pv1	Mineral water Chaudfontaine	Beverages	Y
1134pv1	Berenburg herb liquor	Alcohol	Y
1136pv1	Endive frozen unprepared	Fresh fruit & vegetables	N
1139pv1	Peas and carrots frozen unprepared	Fresh fruit & vegetables	N
1141pv1	Vegetable mixed Mexico frozen unprepared	Fresh fruit & vegetables	N
1143pv1	Beans runner frozen unprepared	Fresh fruit & vegetables	N
1144pv1	Vegetables mixture for soup frozen	Fresh fruit & vegetables	N
1147pv1	Brussel sprouts frozen boiled	Processed fruit & vegetables	N
1148pv1	Beans broad frozen unprepared	Fresh fruit & vegetables	N
1150pv1.02040816326531	Potatoes sliced frozen unprepared	Processed potatoe, pasta, rice	N
1150pv1.25	Potatoes sliced frozen unprepared	Processed potatoe, pasta, rice	N
1150pv1.42857142857143	Potatoes sliced frozen unprepared	Processed potatoe, pasta, rice	N
1152pv1	Salami	Processed meat products	Y
1155pv1	Minced meat loaf fried	Processed meat products	Y
115pv1.11111111111111	Fish medium fat > 2-10 g fat raw	Processed fish products	Y
115pv1.25	Fish medium fat > 2-10 g fat raw	Processed fish products	Y
1161pv1	Cucumber sliced pickled	Processed fruit & vegetables	Y
1162pv1	Sausage cooked	Processed meat products	Y
116pv1.11111111111111	Fish fat > 10 g fat raw	Fresh fish	N
1182pv1	Apple sauce wo sugar tinned	Processed fruit & vegetables	Y
1182pv1.17647058823529	Apple sauce wo sugar tinned	Processed fruit & vegetables	Y
1187pv1	Bamboo shoots tinned	Processed fruit & vegetables	Y
11pv1	Aubergine boiled	Processed fruit & vegetables	N
1213pv1	Soya sauce salt	Sauces water based	Y
1215pv1	Soya sauce sweet	Sauces water based	Y
121pv1	Potatoes mashed prep w semi-sk milk+marg	Processed potatoe, pasta, rice	Y
122pv1	Crisps potato average	Snacks	Y
1232pv1	Pepper red hot paste	Sauces water based	Y
1238pv1	Liver sausage coarse hausmacher	Processed meat products	Y
1239pv1	Liver pate sausage	Processed meat products	Y
1246pv1	Polymeric drink Nutridrink p 100 ml	Milk products	Y
124pv1	Radish red/white raw	Fresh fruit & vegetables	N
124pv1.05263157894737	Radish red/white raw	Fresh fruit & vegetables	N
1253pv1	Crispbread high fibre	Bread	Y
1256pv1	Marzipan	Snacks	Y
1260pv1	Mayonnaise yoghurt based 25% oil	Sauces emulsions	Y
126pv1	Cress garden raw	Fresh fruit & vegetables	N
1279pv1	Infant food meal 15 months	All other products	Y
127pv1	Vegetables mixture raw	Fresh fruit & vegetables	N
1294pv1	Whey drink Taksi w sugar	Beverages	Y
1302pv1	Cheese cream soft Paturain	Cheese -products	Y
1305pv1	Chicken without skin raw	Fresh meat	N
1305pv1.33333333333333	Chicken without skin raw	Fresh meat	N
1305pv1.42857142857143	Chicken without skin raw	Fresh meat	N
1305pv1.53846153846154	Chicken without skin raw	Fresh meat	N
1306pv1.25	Chicken for soup w skin raw	Fresh meat	N
1306pv1.33333333333333	Chicken for soup w skin raw	Fresh meat	N
130pv1	Asparagus tinned	Processed fruit & vegetables	Y
1311pv1	Chocolate confetti averaged	Bread toppings	Y
1312pv1	Crispbread Cracottes	Bread	Y
1318pv1	Biscuit fortified Liga Eerste Stap	Snacks	Y
131pv1	Gherkins sour pickled	Processed fruit & vegetables	Y
1321pv1	Biscuit fortified Liga Fruitkick	Snacks	Y
1322pv1	Crispbread wholemeal Cracottes	Bread	Y
132pv1	Gherkins sweet pickled	Processed fruit & vegetables	Y
1338pv1	Br prod Bambix Groei Ontbijt licht volk	Breakfast cereals	Y
133pv1	Mushrooms tinned	Processed fruit & vegetables	Y
1352pv1	Crackers gluten free Glutafin	Bread	Y
1353pv1	Biscuit gluten free Glutafin	Snacks	Y
1356pv1	Biscuit fortified Liga Evergr assortment	Snacks	Y
135pv1	Pea garden super fine tinned	Processed fruit & vegetables	Y
1361pv1	Bread white Turkish	Bread	Y
1364pv1	Turkish Delight	Snacks	Y
1365pv1	Baklava nut-honey cake	Snacks	Y
1368pv1	Sausage dry salam Turkish	Processed meat products	Y
136pv1	Peas and carrots tinned	Processed fruit & vegetables	Y
1370pv1	Grape leaves glass	Processed fruit & vegetables	Y
1372pv1	Tomato puree Turkish concentrated tinned	Processed fruit & vegetables	Y
137pv1	Olives tinned/glass	Processed fruit & vegetables	Y
1380pv1	Dessert soya Alpro	Milk products	Y
1381pv1	Milk soya Natural Fresh Alpro	Milk products	Y
1382pv1	Cheese 30+	Cheese -products	Y
138pv1	Beans runner tinned	Processed fruit & vegetables	Y
1391pv1	Bacon lean prepared	Processed meat products	Y
1392pv1	Chicken fillet prepared	Processed meat products	Y
1395pv1	Bread rye average	Bread	Y
1398pv1	Kale curly boiled glass	Processed fruit & vegetables	Y
1399pv1	Lettuce iceberg raw	Fresh fruit & vegetables	N
139pv1	Beans French tinned	Processed fruit & vegetables	Y
13pv1	Celery boiled	Processed fruit & vegetables	N
1400pv1.25	Beef rump steak raw	Processed meat products	Y
1400pv1.42857142857143	Beef rump steak raw	Fresh meat	N
1401pv1.25	Beef tenderloin steak raw	Fresh meat	N
1401pv1.42857142857143	Beef tenderloin steak raw	Fresh meat	N
1402pv1.25	Beef prime rib raw	Fresh meat	N
1402pv1.42857142857143	Beef prime rib raw	Fresh meat	N
1404pv1.25	Beef frying steak raw	Fresh meat	N
1404pv1.42857142857143	Beef frying steak raw	Fresh meat	N
1404pv1.53846153846154	Beef frying steak raw	Fresh meat	N
1405pv1	Minced beef raw	Fresh meat	N
1405pv1.17647058823529	Minced beef raw	Fresh meat	N
1405pv1.33333333333333	Minced beef raw	Fresh meat	N
1405pv1.42857142857143	Minced beef raw	Fresh meat	N
1406pv1.53846153846154	Beef rib raw	Fresh meat	N
1406pv1.66666666666667	Beef rib raw	Fresh meat	N
1407pv1.42857142857143	Liver ox raw	Fresh meat	N
1408pv1.25	Beef stewing meat raw	Fresh meat	N
1408pv1.42857142857143	Beef stewing meat raw	Fresh meat	N
1409pv1.25	Beef sirloin rolled raw	Fresh meat	N
1409pv1.42857142857143	Beef sirloin rolled raw	Fresh meat	N
1409pv1.53846153846154	Beef sirloin rolled raw	Fresh meat	N
1409pv1.66666666666667	Beef sirloin rolled raw	Fresh meat	N
140pv1	Spinach tinned	Processed fruit & vegetables	Y
1410pv1	Beef roast raw	Fresh meat	N
1410pv1.25	Beef roast raw	Fresh meat	N
1410pv1.42857142857143	Beef roast raw	Fresh meat	N
1412pv1.42857142857143	Beef rib steak raw	Fresh meat	N
1412pv1.53846153846154	Beef rib steak raw	Fresh meat	N
1412pv1.66666666666667	Beef rib steak raw	Fresh meat	N
1413pv1.53846153846154	Beef streaked/marbled raw	Fresh meat	N
1413pv1.66666666666667	Beef streaked/marbled raw	Fresh meat	N
1414pv1	Beef stewing steak raw	Fresh meat	N
1414pv1.42857142857143	Beef stewing steak raw	Fresh meat	N
1414pv1.53846153846154	Beef stewing steak raw	Fresh meat	N
1414pv1.66666666666667	Beef stewing steak raw	Fresh meat	N
1415pv1	Beef steak tartare raw	Fresh meat	N
1415pv1.25	Beef steak tartare raw	Fresh meat	N
1415pv1.33333333333333	Beef steak tartare raw	Fresh meat	N
1417pv1.05263157894737	Sausage pork Braadworst raw	Fresh meat	Y
1417pv1.33333333333333	Sausage pork Braadworst raw	Fresh meat	Y
1418pv1.33333333333333	Pork fillet raw	Fresh meat	N
1418pv1.42857142857143	Pork fillet raw	Fresh meat	N
1418pv1.53846153846154	Pork fillet raw	Fresh meat	N
1419pv1.33333333333333	Pork fricandeau part of leg raw	Fresh meat	N
1419pv1.42857142857143	Pork fricandeau part of leg raw	Fresh meat	N
1419pv1.53846153846154	Pork fricandeau part of leg raw	Fresh meat	N
141pv1	Tomato puree concentrated tinned	Processed fruit & vegetables	Y
1420pv1.33333333333333	Pork chop raw	Fresh meat	N
1420pv1.42857142857143	Pork chop raw	Fresh meat	N
1420pv1.53846153846154	Pork chop raw	Fresh meat	N
1421pv1	Minced pork raw	Fresh meat	N
1421pv1.33333333333333	Minced pork raw	Fresh meat	N
1421pv1.42857142857143	Minced pork raw	Fresh meat	N
1422pv1.33333333333333	Pork tenderloin raw	Fresh meat	N
1422pv1.42857142857143	Pork tenderloin raw	Fresh meat	N
1424pv1.42857142857143	Pork loin chop raw	Fresh meat	N
1425pv1	Pork shoulder chop raw	Fresh meat	N
1425pv1.33333333333333	Pork shoulder chop raw	Fresh meat	N
1425pv1.42857142857143	Pork shoulder chop raw	Fresh meat	N
1426pv1.42857142857143	Liver pork raw	Fresh meat	N
1427pv1.33333333333333	Pork spare rib raw	Fresh meat	N
1427pv1.42857142857143	Pork spare rib raw	Fresh meat	N
1428pv1	Pork stir fry meat raw	Fresh meat	N
1428pv1.42857142857143	Pork stir fry meat raw	Fresh meat	N
1429pv1.42857142857143	Pork tenderloin medaillon raw	Fresh meat	N
142pv1	Beans broad tinned	Processed fruit & vegetables	Y
1430pv1.42857142857143	Pork shoulder raw	Fresh meat	N
1430pv1.53846153846154	Pork shoulder raw	Fresh meat	N
1431pv1.33333333333333	Kromesky meat filled raw	Fresh meat	Y
1431pv1.42857142857143	Kromesky meat filled raw	Fresh meat	Y
1432pv1	Bacon rasher raw	Fresh meat	N
1432pv1.42857142857143	Bacon rasher raw	Fresh meat	N
1432pv1.66666666666667	Bacon rasher raw	Fresh meat	N
1434pv1	Minced beef/pork raw	Fresh meat	N
1434pv1.17647058823529	Minced beef/pork raw	Fresh meat	N
1434pv1.33333333333333	Minced beef/pork raw	Fresh meat	N
1434pv1.42857142857143	Minced beef/pork raw	Fresh meat	N
1435pv1	Hamburger raw	Fresh meat	Y
1435pv1.33333333333333	Hamburger raw	Fresh meat	Y
1436pv1.42857142857143	Veal prime rib raw	Fresh meat	N
1437pv1	Veal olive raw	Fresh meat	N
1437pv1.42857142857143	Veal olive raw	Fresh meat	N
143pv1	Carrots tinned	Processed fruit & vegetables	Y
1444pv1.33333333333333	Minced lamb raw	Fresh meat	N
1444pv1.42857142857143	Minced lamb raw	Fresh meat	N
1445pv1.33333333333333	Lamb chop raw	Fresh meat	N
144pv1	Silver-skin onions sweet pickled glass	Processed fruit & vegetables	Y
1450pv1	Chocolate plain without sugar	Snacks	Y
1454pv1	Beetroot pickled glass	Processed fruit & vegetables	Y
1455pv1	Potato puree powder av	Processed fruit & vegetables	Y
1456pv1.25	Chips pre-fried unprepared	Processed potatoe, pasta, rice	Y
1456pv1.72413793103448	Chips pre-fried unprepared	Processed potatoe, pasta, rice	Y
1459pv1	Bread current wholemeal	Bread	Y
145pv1	Cabbage red glass	Processed fruit & vegetables	Y
1460pv1	Cake Dutch spiced Ontbijtkoek w ginger	Snacks	Y
1461pv1	Sesame paste tahin	Bread toppings	Y
1462pv1	Juice pineapple	Juice	Y
1463pv1	Fruit juice dk minimal 2 fruits	Beverages	Y
1464pv1	Milk chocolate-flavoured semi-skimmed	Snacks	Y
1465pv1	Liqueur <15 vol% alcohol	Alcohol	Y
1466pv1	Liqueur >25 vol% alcohol	Alcohol	Y
1467pv1	Syrup from tinned fruit	Processed fruit & vegetables	Y
1468pv1	Beer >7 vol% alcohol	Alcohol	Y
1469pv1	Cream custard	Milk products	Y
146pv1	Spinach frozen boiled	Processed fruit & vegetables	N
1470pv1	Berliner pastry	Snacks	Y
1471pv1	Biscuit chocolate	Snacks	Y
1473pv1	Doughnuts plain	Snacks	Y
1474pv1	Ice lolly/ Sorbet	Snacks	Y
1475pv1	Eclair with whipped cream filling	Snacks	Y
1476pv1	Meringue with butter-cream	Snacks	Y
1477pv1	Biscuits sugar free	Snacks	Y
1478pv1	Flan fruit and crumble topping	Snacks	Y
1479pv1	Cheesecake made with cream cheese	Snacks	Y
147pv1	Apple without skin average	Fresh fruit & vegetables	N
147pv1.11111111111111	Apple without skin average	Fresh fruit & vegetables	N
147pv1.17647058823529	Apple without skin average	Fresh fruit & vegetables	N
1480pv1	Biscuit Jaffa cakes/Cake PiM's	Snacks	Y
1481pv1	Rice cakes puffed	Snacks	Y
1484pv1	Onions deep-fried sachet	Processed fruit & vegetables	Y
1487pv1	Cheese Brie 60+	Cheese -products	Y
1488pv1.05263157894737	Pastry puff cheese filled unprepared	Cheese -products	Y
1488pv1.11111111111111	Pastry puff cheese filled unprepared	Cheese -products	Y
1488pv1.17647058823529	Pastry puff cheese filled unprepared	Cheese -products	Y
1489pv1	Cheese fresh light 8% fat	Cheese -products	Y
148pv1	Strawberries	Fresh fruit & vegetables	N
148pv1.11111111111111	Strawberries	Fresh fruit & vegetables	N
1496pv1	Salad fish	Main Dish	Y
149pv1	Apricots with skin	Fresh fruit & vegetables	N
14pv1	Cauliflower raw	Fresh fruit & vegetables	N
1500pv1	Herb mix cube	Sauces water based	Y
1501pv1	Herb and vegetable mix sachet	Sauces water based	Y
1502pv1	Yoghurt half fat	Milk products	Y
1503pv1	Cream 25% fat	Milk products	Y
1505pv1	Crisps potato light unflavoured	Snacks	Y
1507pv1	Fondant cream	Snacks	Y
1508pv1	Chocolates filled/Belguim chocolate	Snacks	Y
1509pv1	Muesli bar with chocolate	Snacks	Y
150pv1	Pineapple	Fresh fruit & vegetables	N
150pv1.11111111111111	Pineapple	Fresh fruit & vegetables	N
1510pv1	Milk soya Nature Ca+ Alpro	Milk products	Y
1511pv1	Hamburger vegetarian unprep	Fresh meat	Y
1512pv1	Schnitzel vegetarian unprep	Fresh meat	Y
1515pv1	Sauce based on roux prepared	Meal sauces	Y
1517pv1	Sauce mix packet <3% fat prepared	Sauces water based	Y
1518pv1	Sauce mix packet >3% fat prepared	Sauces water based	Y
1519pv1	Beer alcohol free <0,1 vol%	Alcohol	Y
151pv1	Banana	Fresh fruit & vegetables	N
151pv1.11111111111111	Banana	Fresh fruit & vegetables	N
1521pv1	Juice drink light	Beverages	Y
1522pv1	Soft drink light without caffeine	Beverages	Y
1523pv1	Cola light soft drink with caffeine	Beverages	Y
1524pv1	Sauce tomato ready made jar	Sauces water based	Y
1528pv1	Stock from cube prepared	Soups	Y
152pv1	Blueberries	Fresh fruit & vegetables	N
1530pv1	Butter product half fat	Oils, fats & fat spreads	Y
1534pv1	Pizza crossa crust frozen	Main Dish	Y
153pv1	Redcurrant	Fresh fruit & vegetables	N
153pv1.11111111111111	Redcurrant	Fresh fruit & vegetables	N
1544pv1	Beef rolled prepared	Fresh meat	N
1545pv1	Beef roast prepared	Processed meat products	Y
154pv1	Blackcurrants	Fresh fruit & vegetables	N
1558pv1	Pork loin chop prepared	Processed meat products	Y
155pv1	Bilberries	Fresh fruit & vegetables	N
155pv1.11111111111111	Bilberries	Fresh fruit & vegetables	N
1568pv1	Minced beef/pork ball prep w egg/crumbs	Processed meat products	Y
1572pv1	Veal fricandeau prepared	Processed meat products	Y
157pv1	Blackberries	Fresh fruit & vegetables	N
157pv1.11111111111111	Blackberries	Fresh fruit & vegetables	N
1586pv1	Mackerel fillet smoked	Processed fish products	Y
1587pv1	Salmon raw	Fresh fish	N
1588pv1	Anchovy in oil canned	Processed fish products	Y
1589pv1	Tuna in oil tinned	Processed fish products	Y
158pv1	Lemon	Fresh fruit & vegetables	N
1590pv1	Tuna in water tinned	Processed fish products	Y
1591pv1	Sweetener aspartame per tablet	All other products	Y
1592pv1	Sweetener saccharine per tablet	All other products	Y
1593pv1	Sweetener aspartame/acesulfame p tablet	All other products	Y
1594pv1	Sweetener saccharine/cyclamate p tablet	All other products	Y
1596pv1	Sweetener aspartame powder per tsp	All other products	Y
1597pv1	Sweetener aspartame/acesulfame per tsp	All other products	Y
1598pv1	Sweetener saccharine powder per tsp	All other products	Y
159pv1	Cranberries	Fresh fruit & vegetables	N
15pv1	Cauliflower boiled	Processed fruit & vegetables	N
1602pv1	Milk soya several flavours Alpro	Milk products	Y
1608pv1	Mackerel prepared in microwave oven	Processed fish products	Y
1609pv1	Mackerel in oil tinned	Processed fish products	Y
160pv1	Grapes with skin average	Fresh fruit & vegetables	N
160pv1.11111111111111	Grapes with skin average	Fresh fruit & vegetables	N
1610pv1	Salmon farmed prep in microwave oven	Processed fish products	Y
1611pv1	Trout prepared in microwave oven	Processed fish products	Y
1612pv1	Salmon trout prepared in microwave oven	Processed fish products	Y
1618pv1	Dab/lemon dab prep in microwave oven	Processed fish products	Y
1619pv1	Sole prepared in microwave oven	Processed fish products	Y
161pv1	Raspberries	Fresh fruit & vegetables	N
161pv1.11111111111111	Raspberries	Fresh fruit & vegetables	N
1621pv1	Gurnard prepared in microwave oven	Processed fish products	Y
1622pv1	Perch prepared in microwave oven	Processed fish products	Y
1623pv1	Wolf fish prepared in microwave oven	Processed fish products	Y
1624pv1	Eel prepared in microwave oven	Processed fish products	Y
162pv1	Grapefruit	Fresh fruit & vegetables	N
1632pv1	Squid prepared in microwave oven	Processed fish products	Y
1634pv1	Chicken fillet raw	Fresh meat	N
1634pv1.33333333333333	Chicken fillet raw	Fresh meat	N
1634pv1.42857142857143	Chicken fillet raw	Fresh meat	N
163pv1	Cherries	Fresh fruit & vegetables	N
1641pv1	Chicken rolled prepared	Processed meat products	Y
1642pv1.42857142857143	Chicken rolled raw	Processed meat products	Y
1643pv1	Chicken nuggets prepared in oven	Processed meat products	Y
164pv1	Gooseberries	Fresh fruit & vegetables	N
1650pv1	Cheese goat fresh	Cheese -products	Y
1655pv1	Fruit juice concentrated	Juice	Y
165pv1	Manderins	Fresh fruit & vegetables	N
165pv1.11111111111111	Manderins	Fresh fruit & vegetables	N
1663pv1.25	Beef <5% fat raw average	Fresh meat	N
1663pv1.42857142857143	Beef <5% fat raw average	Fresh meat	N
1663pv1.53846153846154	Beef <5% fat raw average	Fresh meat	N
1667pv1.42857142857143	Pork <5% fat raw	Fresh meat	N
1668pv1.33333333333333	Pork 5-14% fat raw	Fresh meat	N
1668pv1.42857142857143	Pork 5-14% fat raw	Fresh meat	N
1668pv1.53846153846154	Pork 5-14% fat raw	Fresh meat	N
166pv1	Melon netted	Fresh fruit & vegetables	N
1671pv1	Pork 10-19% fat prepared	Processed meat products	Y
1673pv1.42857142857143	Veal <5% fat raw average	Fresh meat	N
1673pv1.47058823529412	Veal <5% fat raw average	Fresh meat	N
1673pv1.53846153846154	Veal <5% fat raw average	Fresh meat	N
1675pv1	Lamb >10 g fat raw average	Fresh meat	N
1675pv1.33333333333333	Lamb >10 g fat raw average	Fresh meat	N
1675pv1.42857142857143	Lamb >10 g fat raw average	Fresh meat	N
1675pv1.47058823529412	Lamb >10 g fat raw average	Fresh meat	N
1679pv1	Chips oven frozen prepared	Processed potatoe, pasta, rice	Y
168pv1	Pear without skin	Fresh fruit & vegetables	N
168pv1.11111111111111	Pear without skin	Fresh fruit & vegetables	N
1699pv1	Biscuits & snacks cheesy averaged	Snacks	Y
169pv1	Peach without skin	Fresh fruit & vegetables	N
16pv1	Kale curly boiled	Processed fruit & vegetables	N
1702pv1	Pd Nutridrink Multi Fibre per 100 ml	All other products	Y
1704pv1	Pef Fortify Complete powder	All other products	Y
170pv1	Plums with skin	Fresh fruit & vegetables	N
170pv1.11111111111111	Plums with skin	Fresh fruit & vegetables	N
1719pv1	Milk semi-skimmed enriched w calcium	Milk products	N
171pv1	Orange	Fresh fruit & vegetables	N
171pv1.11111111111111	Orange	Fresh fruit & vegetables	N
1720pv1	Custard several flavours full fat	Milk products	Y
1721pv1	Yoghurt vanilla half fat	Milk products	Y
1722pv1	Porridge semolina	Milk products	Y
1723pv1	Cheese 20+	Cheese -products	Y
1724pv1	Cheese 50+	Cheese -products	Y
1725pv1	Cheese Leerdammer/Maasdammer 45+	Cheese -products	Y
1726pv1	Cheese 40+ Leiden w cumin/Fries clove	Cheese -products	Y
1727pv1	Cheese 20+ rindless	Cheese -products	Y
172pv1	Fruit fresh citrus average	Fresh fruit & vegetables	N
172pv1.11111111111111	Fruit fresh citrus average	Fresh fruit & vegetables	N
173pv1	Fruit fresh average excluding citrus	Fresh fruit & vegetables	N
174pv1	Strawberries in syrup tinned	Processed fruit & vegetables	Y
174pv1.11111111111111	Strawberries in syrup tinned	Processed fruit & vegetables	Y
175pv1	Apricots dried	Fresh fruit & vegetables	N
1764pv1	Infant food fruit 12 months	All other products	Y
1767pv1	Biscuits children's Bambix beestenkoekje	Snacks	Y
176pv1	Apricots in syrup tinned	Processed fruit & vegetables	Y
1771pv1	Liver pate/Berliner liver sausage	Processed meat products	Y
1772pv1	Pork fricandeau fried	Processed meat products	Y
1773pv1	Brawn, pork pickled in vinegar	Processed meat products	Y
1774pv1	Sausage tongue	Processed meat products	Y
1776pv1	Ham lean grilled	Processed meat products	Y
1777pv1	Gammon boiled deboned	Processed meat products	Y
1779pv1	Crispbread wholemeal	Bread	Y
177pv1	Pineapple in syrup tinned	Processed fruit & vegetables	Y
177pv1.11111111111111	Pineapple in syrup tinned	Processed fruit & vegetables	Y
1788pv1.42857142857143	Pork rib chop raw	Fresh meat	N
1788pv1.53846153846154	Pork rib chop raw	Fresh meat	N
1790pv1.25	Pork schnitzel not breaded raw	Fresh meat	N
1790pv1.42857142857143	Pork schnitzel not breaded raw	Fresh meat	N
1791pv1	Cream whipped w sugar canned	Milk products	Y
179pv1	Apple sauce tinned	Processed fruit & vegetables	Y
1802pv1	Crispbread sandwich Wasa	Bread	Y
1803pv1	Sauce oriental ready-made in jar/bag	Meal sauces	Y
1807pv1	Fruit drink conc other flavours	Juice	Y
1808pv1	Creme fraiche	Milk products	Y
1809pv1	Cheese 45+	Cheese -products	Y
180pv1	Billberries in syrup tinned	Processed fruit & vegetables	Y
1810pv1	Fruit drink concentrate Karvan Cevitam	Beverages	Y
1811pv1	Beans long yard Kouseband boiled	Processed fruit & vegetables	N
1812pv1	Nectarine	Fresh fruit & vegetables	N
1812pv1.11111111111111	Nectarine	Fresh fruit & vegetables	N
1813pv1	Yakult	Milk products	Y
181pv1	Dates candied	Processed fruit & vegetables	Y
1829pv1	Yoghurt half fat Vifit naturel	Milk products	Y
182pv1	Raspberries in syrup tinned	Processed fruit & vegetables	Y
182pv1.11111111111111	Raspberries in syrup tinned	Processed fruit & vegetables	Y
1831pv1	Yoghurt drink Vifit natural	Milk products	Y
1832pv1	Yoghurt drink Vifit fruit	Milk products	Y
1833pv1	Yoghurt l fat w fruit/van w sw Optimel	Milk products	Y
1834pv1	Yoghurt drink w sweeteners Optimel	Milk products	Y
1839pv1	Low fat margarine product tub Becel Ligh	Oils, fats & fat spreads	Y
183pv1	Fruit cocktail in syrup tinned	Processed fruit & vegetables	Y
1847pv1	Margarine product tub Becel Dieet	Oils, fats & fat spreads	Y
184pv1	Cherries in syrup tinned	Processed fruit & vegetables	Y
184pv1.11111111111111	Cherries in syrup tinned	Processed fruit & vegetables	Y
185pv1	Currants dried	Fresh fruit & vegetables	N
186pv1	Tangerines in syrup tinned	Processed fruit & vegetables	Y
186pv1.11111111111111	Tangerines in syrup tinned	Processed fruit & vegetables	Y
1878pv1	Fruit juice drink Roosvicee Multivit	Beverages	Y
1880pv1	Fruit drink conc Roosvicee Calcium	Juice	Y
1881pv1	Fruit drink conc Roosvicee Multivit	Beverages	Y
1882pv1	Fruit drink conc low sugar Lessini	Beverages	Y
1885pv1	Water average	Water	N
1885pv1	Water average	Water	N
1886pv1	Mango chutney	Sauces water based	Y
1887pv1	Dates fresh	Fresh fruit & vegetables	N
188pv1	Pears in syrup tinned	Processed fruit & vegetables	Y
1892pv1	Cabbage pak-choi raw	Fresh fruit & vegetables	N
1892pv1.42857142857143	Cabbage pak-choi raw	Fresh fruit & vegetables	N
1893pv1	Cheese Bel Paese	Cheese -products	Y
1895pv1	Pecan nuts unsalted	Snacks	Y
1896pv1	Pistachio nuts salted	All other products	Y
1897pv1.05263157894737	Seaweed kelp raw	Fresh fruit & vegetables	N
1898pv1	Seaweed agar agar dried	Fresh fruit & vegetables	N
189pv1	Peaches in syrup tinned	Processed fruit & vegetables	Y
189pv1.11111111111111	Peaches in syrup tinned	Processed fruit & vegetables	Y
18pv1	Mushrooms chanterelle boiled	Processed fruit & vegetables	N
1900pv1.42857142857143	Goat meat raw average	Processed meat products	Y
1902pv1.42857142857143	Kidney ox raw	Fresh meat	N
1904pv1	Vegetables average boiled	Processed fruit & vegetables	N
1905pv1	Vegetables average raw	Fresh fruit & vegetables	N
1906pv1	Fruit fresh average including citrus	Fresh fruit & vegetables	N
1907pv1	Processed meat prod excl liver average	Processed meat products	Y
1908pv1	Processed meat prod <10 g fat excl liver	Processed meat products	Y
1909pv1	Sausage excl liver average	Processed meat products	Y
190pv1	Prunes dried	Fresh fruit & vegetables	N
1914pv1	Dough for pizza and savoury pie	Grains and cereals	Y
1915pv1	Eclair without filling	Snacks	Y
1916pv1	Cream whipped with added sugar	Milk products	Y
191pv1	Plums in syrup tinned	Processed fruit & vegetables	Y
192pv1	Fruit mixed dried	Fresh fruit & vegetables	N
1932pv1	Juice orange with pulp	Juice	Y
1933pv1	Juice tomato/vegetable Appelsientje	Beverages	Y
1934pv1	Juice tomato Appelsientje Zontomaat	Juice	Y
1935pv1	Nuts mixed salted	Snacks	Y
1936pv1.33333333333333	Turkey fillet raw	Fresh meat	N
1936pv1.42857142857143	Turkey fillet raw	Fresh meat	N
1937pv1	Crisps tortilla unflavoured	Snacks	Y
1938pv1	Peanut sauce packet prepared	Meal sauces	Y
1939pv1	Cheese Gorgonzola	Cheese -products	Y
193pv1	Figs dried	Fresh fruit & vegetables	N
1943pv1	Japanese rice cracker mix w peanuts	Snacks	Y
1945pv1	Bun with vanilla custard	Snacks	Y
1953pv1	Soya based yoghurt Yofu soja Alpro	Milk products	Y
1954pv1	Coffee creamer Balance	Milk products	Y
1955pv1	Cheese Mozzarella	Cheese -products	Y
1956pv1	Low fat spread Becel pro-activ	Oils, fats & fat spreads	Y
1957pv1	Custard with whipped cream	Milk products	Y
1958pv1	Porrdige buttermilk groats	Milk products	Y
1961pv1	Low fat marg prod Blue Band Goede Start	Oils, fats & fat spreads	Y
1962pv1	Chocolate confetti milk	Bread toppings	Y
1963pv1	Chocolate confetti plain	Bread toppings	Y
1964pv1	Spread chocolate milk	Bread toppings	Y
1965pv1	Biscuit fortified Liga Milkbreak	Snacks	Y
1968pv1	Mineral water Sourcy	Water	N
1969pv1	Cake made with butter	Snacks	Y
196pv1	Peas marrowfat legumes tinned	Processed fruit & vegetables	Y
1970pv1	Milk chocolate-flavoured Chocomel light	Milk products	Y
1972pv1	Biscuits assorted with butter	Snacks	Y
197pv1	Beans baked in tomato sauce tinned	Processed fruit & vegetables	Y
198pv1	Almonds blanched unsalted	Snacks	Y
1991pv1	Br prod Bambix Peuter Ontbijt 8 granen	Snacks	Y
1997pv1	Preparation Respifor p 100 ml	All other products	Y
1998pv1	Drink fruit Stimulance multifibre	Beverages	Y
1999pv1	Breakfast product Frosties Kellogg's	Breakfast cereals	Y
199pv1	Cashew nuts unsalted	All other products	N
19pv1	Mushrooms raw	Fresh fruit & vegetables	N
2002pv1	Breakfast prod Coco Pops Kellogg's	Breakfast cereals	Y
2004pv1	Breakfast cereal All-Bran Fruit n Fibre	Breakfast cereals	Y
2005pv1	Breakfast product Special K Original	Breakfast cereals	Y
2006pv1	Breakfast cereal Smacks Kellogg's	Breakfast cereals	Y
2007pv1	Breakfast cereal Honey Loops Kellogg's	Breakfast cereals	Y
200pv1	Hazelnuts unsalted	All other products	N
2010pv1	Sponge cake w fruit	Snacks	Y
201pv1	Chestnuts	Snacks	Y
2023pv1	Yoghurt drink Yoki drink w sweetners	Milk products	Y
202pv1	Coconut meat fresh	Fresh fruit & vegetables	N
2030pv1.17647058823529	Quorn minced unprepared	Processed meat products	Y
2031pv1	Quorn pieces unprepared	Fresh meat	Y
2031pv1.17647058823529	Quorn pieces unprepared	Fresh meat	Y
2032pv1.06382978723404	Quorn fillet crumbed unprepared	Fresh meat	Y
2038pv1	Yoghurt drink Yomild drink naturel	Milk products	Y
2039pv1	Yoghurt drink Yoki drink	Milk products	Y
203pv1	Brazil nuts unsalted	Snacks	Y
2040pv1	Sports drink AA Sportwater	Beverages	Y
2041pv1	Sports drink AA Isotone	Beverages	Y
2042pv1	Sports drink AA High Energy	Beverages	Y
2043pv1	Sports drink AA Multi Nine	Beverages	Y
2046pv1	Vegetarian mincemeat balls unprep	Fresh meat	Y
2046pv1.05263157894737	Vegetarian mincemeat balls unprep	Fresh meat	Y
2047pv1	Mincemeat vegetarian unprepared	Processed meat products	Y
2047pv1.05263157894737	Mincemeat vegetarian unprepared	Processed meat products	Y
2048pv1	Peanuts dry roasted	All other products	Y
2051pv1	Drink breakfast Brinta Wake Up	Breakfast cereals	Y
2052pv1	Dairy dr Milk&Fruit strawberry-cherry	Milk products	Y
2053pv1	Dairy drink Milk&Fruit orange	Milk products	Y
2054pv1	Infant food meal 12 months	All other products	Y
2057pv1.42857142857143	Lamb <10 g fat raw av	Fresh meat	N
2058pv1.42857142857143	Mutton <10g fat raw av	Fresh meat	N
2059pv1	Low fat margarine 40% fat <17 g sat	Oils, fats & fat spreads	Y
205pv1	Mixed nuts and raisins	All other products	N
2060pv1	Low fat margarine prod 35% fat <10 g sat	Oils, fats & fat spreads	Y
2061pv1	Low fat marg prod 20-25% fat <10 g sat	Oils, fats & fat spreads	Y
2062pv1	Margarine 80% fat 17-24 g saturates	Oils, fats & fat spreads	Y
2063pv1	Margarine 80% fat >24 g saturates	Oils, fats & fat spreads	Y
2064pv1	Margarine product 70% fat <17 g sat	Oils, fats & fat spreads	Y
2065pv1	Margarine product 70% fat >17 g sat	Oils, fats & fat spreads	Y
2066pv1	Cooking fat liquid 97% fat <17 g sat	Oils, fats & fat spreads	Y
2067pv1	Cooking fat solid 97% fat >17 g sat	Oils, fats & fat spreads	Y
2068pv1	Frying fat liquid <24 g sat fatty acids	Oils, fats & fat spreads	N
2069pv1	Frying fat solid >24 g sat <10 g trans	Oils, fats & fat spreads	N
206pv1	Walnuts unsalted	All other products	N
2072pv1	Margarine product 60% fat <17 g sat	Oils, fats & fat spreads	Y
2073pv1	Cooking fat solid 80% fat >17 g sat	Oils, fats & fat spreads	Y
2074pv1	Mineral water Bar le Duc	Water	N
2076pv1	Low fat margarine product Benecol light	Oils, fats & fat spreads	Y
2077pv1	Margarine liq 80% fat <17 g saturates	Oils, fats & fat spreads	Y
2079pv1	Breakfast drink HeroFruitontbijt p 100ml	Beverages	Y
207pv1	Nuts mixed unsalted	All other products	N
2081pv1	Breakfast cereal Cornflakes	Breakfast cereals	Y
2083pv1	Mayonnaise product w olive oil	Sauces emulsions	Y
2086pv1	Ice tea	Beverages	Y
2087pv1	Ice tea light	Beverages	Y
2088pv1	Ice tea with suiker and sweetner	Beverages	Y
2089pv1.33333333333333	Ostrich, raw	Fresh meat	N
2089pv1.42857142857143	Ostrich, raw	Fresh meat	N
2090pv1	Chicken drumstick w skin raw	Fresh meat	N
2090pv1.33333333333333	Chicken drumstick w skin raw	Fresh meat	N
2090pv1.42857142857143	Chicken drumstick w skin raw	Fresh meat	N
209pv1	Breakfast cereal Cornflakes Kellogg's	Breakfast cereals	Y
20pv1	Mushrooms boiled	Processed fruit & vegetables	N
2108pv1	Chips prepared average	Processed potatoe, pasta, rice	Y
2109pv1	Cassava boiled	Processed potatoe, pasta, rice	N
2111pv1	Yam boiled	Processed potatoe, pasta, rice	N
2112pv1	Sweet potato boiled	Processed potatoe, pasta, rice	N
2113pv1	Pumpkin boiled	Processed fruit & vegetables	N
2115pv1	Bread loaf glutenfree Glutafin	Bread	Y
2134pv1	Juice drink Dubbelfrisss	Beverages	Y
2135pv1	Juice drink Vruchtenfris/Tintelfruit	Beverages	Y
2136pv1	Lemonade squash Dubbelfrisss light	Beverages	Y
2137pv1	Juice drink Vruchtenfris/Tintelfruit lig	Beverages	Y
2138pv1	Juice drink Spa&Fruit still	Beverages	Y
2139pv1	Juice drink Spa&Fruit light still	Beverages	Y
213pv1	Oatmeal	Breakfast cereals	N
2140pv1	Lemonade squash Sap&Fruit Vitamins	Beverages	Y
2141pv1	Mineral water w sweetner	Water	N
2142pv1	Wine white sweet	Alcohol	Y
2144pv1	Juice apple with vitamin C	Juice	Y
2145pv1	Juice fruit Vitamientje oranje vruchten	Juice	Y
2146pv1	Fruit drink Vitamientje bosvr	Beverages	Y
2147pv1	Japanese rice cracker mix wo peanuts	Snacks	Y
2150pv1	Juice fruit Coolbest Vitaday tropical	Juice	Y
2151pv1	Juice fruit Coolbest Vitaday original	Juice	Y
2152pv1	Fruit juice dk Coolbest light orange	Juice	Y
2153pv1	Fruit drink Fruit2day	Beverages	Y
2154pv1	Juice fruit multi w vitamins SuperdeBoer	Juice	Y
2157pv1	Pasta wholemeal boiled	Processed potatoe, pasta, rice	Y
2158pv1	Couscous boiled	Processed potatoe, pasta, rice	N
2159pv1	Millet boiled	Processed potatoe, pasta, rice	N
215pv1	Cornflour	Grains and cereals	Y
2162pv1	Biscuit Cafe noir	Snacks	Y
2163pv1	Crisps maize Bugles	Snacks	Y
2172pv1	Nutrilon toddler milk p 100 ml	All other products	Y
2173pv1	Crisps based on potato flour	Snacks	Y
2176pv1	Pine nuts	All other products	N
2178pv1	Pesto	All other products	Y
2190pv1	Brownies with nuts	Snacks	Y
21pv1	Cabbage Chinese raw	Fresh fruit & vegetables	N
220pv1	Flour wheat white 75% extraction	Grains and cereals	Y
2218pv1	Sports drink Extran Energy	Beverages	Y
2219pv1	Sports drink Extran Hydro	Beverages	Y
2220pv1	Whey drink Taksi w sugar and sweetener	Beverages	Y
2222pv1	Cake Dutch spiced Ontbijtkoek Happers	Snacks	Y
2224pv1	Cake Dutch spiced Kapitein Koek	Snacks	Y
2225pv1	Biscuit fortified Fruitkick Extra	Snacks	Y
2226pv1	Biscuit fortified Liga Continue vit/min	Snacks	Y
2227pv1	Biscuit filled Prince	Snacks	Y
2228pv1	Biscuit with chocolate layer Scholiertje	Snacks	Y
2229pv1	Crackers VitaLU	Bread	Y
222pv1	Flour wheat 50% extraction	Grains and cereals	Y
2230pv1	Crispbread Cracottes Vital	Bread	Y
2231pv1	Rice cakes puffed w chocolate	Snacks	Y
2232pv1	Biscuit fruit	Snacks	Y
2233pv1	Cake Dutch spiced Ontbijtkoek w raisin	Snacks	Y
2234pv1	Cereal bar Hero B'tween	Snacks	Y
2235pv1	Cereal bar Hero B'tween free	Snacks	Y
2237pv1	Cereal bar Special K Kellogg's	Snacks	Y
2239pv1	Muesli bar	Snacks	Y
223pv1	Binding agents averaged	Grains and cereals	Y
2240pv1	Melk goats- full fat	Milk products	Y
2241pv1	Yoghurt snack Breaker	Milk products	Y
2243pv1	Yoghurt snack Breaker Light	Snacks	Y
2244pv1	Yoghurt cream- with fruit	Milk products	Y
2245pv1	Yoghurt low fat w fruit w sw Vitalinea	Milk products	Y
2246pv1	Fromage frais low fat w fruit w sw	Milk products	Y
2247pv1	Fromage frais yoghurt w fruit	Milk products	Y
2248pv1	Fromage frais w fruit Danoontje	Milk products	Y
2250pv1	Ice lolly Festini	Snacks	Y
2251pv1	Ice cream dairy w chocolate coating	Snacks	Y
2252pv1	Ice cream dairy w fruitcoating	Snacks	Y
2253pv1	Yoghurt drink Vifit fruit light	Milk products	Y
2254pv1	Yoghurt drink with sweetners	Milk products	Y
2255pv1	Yoghurt drink Fristi with sweetners	Milk products	Y
2256pv1	Yoghurt drink Yomild drink fruit	Milk products	Y
2257pv1	Breakfast drink Goede Morgen original	Milk products	Y
2258pv1	Actimel	Milk products	Y
2259pv1	Dairy drink Milk&Fruit light	Milk products	Y
225pv1	Breakfast cereal Brinta	Breakfast cereals	Y
2262pv1	Cream based on veg oil Cuisine Alpro	Milk products	Y
2264pv1	Cheese 10+	Cheese -products	Y
2265pv1	Yakult light	Milk products	Y
2266pv1	Chocolate white	Snacks	Y
2267pv1	Custard no fat w sweetners Optimel	Milk products	Y
2268pv1	Creme fraiche half fat	Milk products	Y
2269pv1	Blancmange low fat w sugar	Milk products	Y
226pv1	Starch potato	Grains and cereals	Y
2270pv1	Mousse chocolate light	Milk products	Y
2271pv1	Pasta glutenfree raw	Processed potatoe, pasta, rice	Y
2275pv1	Cream cooking	Milk products	Y
2276pv1	Cream cooking light	Milk products	Y
2277pv1	Bread Blue Band Goede Start white bread	Bread	Y
2278pv1	Yoghurt full fat w fruit/muesli Activia	Milk products	Y
2279pv1	Cream type prod Blue Band Finesse	Milk products	Y
227pv1	Crispbakes Dutch	Bread	Y
2281pv1	Vegetarian product wo brdcrumbs Valess	Processed meat products	Y
2281pv1.06382978723404	Vegetarian product wo brdcrumbs Valess	Processed meat products	Y
2282pv1.06382978723404	Vegetarian schnitzel Valess unprepared	Processed meat products	Y
2285pv1	Vegetarian sausages unprepared	Processed meat products	Y
2285pv1.05263157894737	Vegetarian sausages unprepared	Processed meat products	Y
2286pv1	Vegetable burger vegetarian unpr	Processed meat products	Y
2286pv1.06382978723404	Vegetable burger vegetarian unpr	Processed meat products	Y
2287pv1	Fruit drink conc w sugar and sweetners	Beverages	Y
2288pv1	Fruit drink conc w sugar and sw w vitC	Beverages	Y
2289pv1	Fruit drink concentrate light	Beverages	Y
228pv1	Crackers cream	Bread	Y
2290pv1	Coconut milk	Beverages	Y
2291pv1	Fruit juice conc with added vit C	Beverages	Y
2292pv1	Boiled sweets sugar free	Snacks	Y
2293pv1	Tomatoes tinned	Processed fruit & vegetables	Y
2294pv1	Low fat margarine Twenty four Ultralight	Oils, fats & fat spreads	Y
2295pv1	Butter product 25% fat	Oils, fats & fat spreads	Y
2297pv1	Tuna raw	Fresh fish	N
2297pv1.11111111111111	Tuna raw	Fresh fish	N
2297pv1.33333333333333	Tuna raw	Fresh fish	N
2299pv1.11111111111111	Tilapia raw	Fresh fish	N
2299pv1.25	Tilapia raw	Fresh fish	N
2299pv1.33333333333333	Tilapia raw	Fresh fish	N
229pv1	Crispbread averaged	Bread	Y
22pv1	Cabbage Chinese boiled	Processed fruit & vegetables	N
2300pv1	Sausage smoked lean cooked	Processed meat products	Y
2301pv1	Sausage smoked beef cooked	Processed meat products	Y
2302pv1	Sausage frankfurter lean tinned	Processed meat products	Y
2303pv1	Sausage cooked lean	Processed meat products	Y
2304pv1	Salami sausage saveloy lean	Processed meat products	Y
2305pv1	Liver pate/Berliner liver sausage lean	Processed meat products	Y
2306pv1	Sausage luncheon meat lean	Processed meat products	Y
2307pv1	Minced meat loaf fried lean	Processed meat products	Y
2308pv1	Yoghurt drink Becel pro-activ	Milk products	Y
2309pv1	Milkdrink half fat Becel pro.activ	Milk products	Y
230pv1	Roll white soft	Bread	Y
2310pv1	Yoghurt product Becel pro-activ	Milk products	Y
2311pv1	Breezer	Alcohol	Y
2312pv1	Roti Surinam pancake	Processed potatoe, pasta, rice	Y
231pv1	Wheat germ	Grains and cereals	Y
2322pv1	Potatoes mashed instant prep w s-sk milk	Processed potatoe, pasta, rice	Y
2323pv1	Potatoes mashed instant prepared w water	Processed potatoe, pasta, rice	Y
2324pv1	Potatoes mashed prep w s-sk milk wo fat	Processed potatoe, pasta, rice	Y
2325pv1	Potatoes boiled with skin av	Processed potatoe, pasta, rice	N
2326pv1.25	Croquettes potato frozen unprepared	Processed potatoe, pasta, rice	Y
2327pv1	Lettuce mixture	Processed fruit & vegetables	N
2328pv1	Fruit juice drink w dairy Wicky peach	Beverages	Y
2329pv1	Cake Dutch spiced Ontbijtkoek less sugar	Snacks	Y
232pv1	Danish pastry	Snacks	Y
2330pv1	Mange-tout and carrots boiled	Processed fruit & vegetables	N
2331pv1	Bami vegetables mixed boiled	Processed fruit & vegetables	N
2332pv1	Herb and vegetable mix prep sachet	Processed fruit & vegetables	Y
2333pv1.17647058823529	Minced meat raw average	Fresh meat	N
2333pv1.33333333333333	Minced meat raw average	Fresh meat	N
2333pv1.42857142857143	Minced meat raw average	Fresh meat	N
2334pv1.11111111111111	Minced meat beef/pork raw w egg/brcrumbs	Processed meat products	Y
2334pv1.17647058823529	Minced meat beef/pork raw w egg/brcrumbs	Processed meat products	Y
2334pv1.25	Minced meat beef/pork raw w egg/brcrumbs	Processed meat products	Y
2334pv1.33333333333333	Minced meat beef/pork raw w egg/brcrumbs	Processed meat products	Y
2335pv1.42857142857143	Meat average raw excl liver	Processed meat products	Y
2335pv1.53846153846154	Meat average raw excl liver	Fresh meat	N
2336pv1	Beef average raw	Fresh meat	N
2336pv1.25	Beef average raw	Fresh meat	N
2336pv1.42857142857143	Beef average raw	Fresh meat	N
2336pv1.53846153846154	Beef average raw	Fresh meat	N
2337pv1.17647058823529	Minced beef raw w egg and breadcrumbs	Processed meat products	Y
2338pv1.53846153846154	Beef for stewing averaged raw	Fresh meat	N
2338pv1.66666666666667	Beef for stewing averaged raw	Fresh meat	N
2339pv1	Beef olives raw	Processed meat products	Y
2339pv1.25	Beef olives raw	Processed meat products	Y
2339pv1.42857142857143	Beef olives raw	Processed meat products	Y
233pv1	Bread currant	Bread	Y
2340pv1.25	Pork schnitzel breaded raw	Processed meat products	Y
2340pv1.42857142857143	Pork schnitzel breaded raw	Processed meat products	Y
2341pv1.33333333333333	Chicken fillet breaded raw	Processed meat products	Y
2341pv1.42857142857143	Chicken fillet breaded raw	Processed meat products	Y
2342pv1	Chicken fillet in batter raw	Processed meat products	Y
2343pv1	Jelly	Snacks	Y
2344pv1	Pork filled with ham and cheese raw	Processed meat products	Y
2344pv1.25	Pork filled with ham and cheese raw	Processed meat products	Y
2344pv1.42857142857143	Pork filled with ham and cheese raw	Processed meat products	Y
2345pv1	Peanuts sugar coated	Snacks	Y
2346pv1	Lettuce green average raw	Snacks	Y
2347pv1	Tortellini boiled	Processed potatoe, pasta, rice	Y
2348pv1	Bread wholemeal w pumpkin seeds	Bread	Y
2349pv1	Bread linseed	Bread	Y
234pv1	Biscuit fortified Liga Tweede Stap	Snacks	Y
2350pv1	Bread multigrain average w seeds	Bread	Y
2351pv1	Bread white average milk/water based	Bread	Y
2352pv1	Bread currant w almond paste	Bread	Y
2353pv1	Bread brown/wholemeal w muesli	Bread	Y
2354pv1	Bread wholemeal w nuts	Bread	Y
2355pv1	Bread white w sugar Suikerbrood	Bread	Y
2356pv1	Baguette w cheese-onion	Bread	Y
2357pv1	Bread wholemeal w sunflower seeds	Bread	Y
2358pv1	Bread white w sunflower seeds	Bread	Y
2359pv1	Wrap/Tortilla	Processed potatoe, pasta, rice	Y
235pv1	Biscuit fort Liga Derde Stap Wholemeal	Snacks	Y
2360pv1	Rice cakes puffed w caramel	Snacks	Y
2361pv1	Breakfast prod Albona 7-cereals-energy	Breakfast cereals	Y
2362pv1	Sausage Dutch Frikandel frozen unprep	Processed meat products	Y
2362pv1.11111111111111	Sausage Dutch Frikandel frozen unprep	Processed meat products	Y
2363pv1	Minced meat w ham and cheese raw	Processed meat products	Y
2363pv1.25	Minced meat w ham and cheese raw	Processed meat products	Y
2364pv1	Chicken schnitzel raw	Processed meat products	Y
2364pv1.33333333333333	Chicken schnitzel raw	Processed meat products	Y
2364pv1.42857142857143	Chicken schnitzel raw	Processed meat products	Y
2365pv1	Chicken cordon bleu raw	Processed meat products	Y
2365pv1.11111111111111	Chicken cordon bleu raw	Processed meat products	Y
2365pv1.25	Chicken cordon bleu raw	Processed meat products	Y
2366pv1	Muesli crunchy plain/w fruit	Breakfast cereals	Y
2367pv1	Peanut butter light	Bread toppings	Y
2368pv1	Milk drink pow w fruit flavour Nesquik	Milk products	Y
2369pv1	Breadsticks	Bread	Y
236pv1	Bread brown wheat	Bread	Y
2370pv1	Cocktail snacks based on corn or wheat	Snacks	Y
2371pv1	Tiramisu	Snacks	Y
2372pv1	Raisins coated w milkchocolate	Snacks	Y
2373pv1	After eight chocolate mints	Snacks	Y
2374pv1	Chocolate milk w raisins	Snacks	Y
2375pv1	Chocolate plain w nuts	Snacks	Y
2376pv1	Chocolate milk w puffed rice	Snacks	Y
2377pv1	Tomatoes dried in oil tin/glass	Processed fruit & vegetables	Y
2378pv1	Tomato sun-dried	Processed fruit & vegetables	Y
2379pv1	Raisins soaked in water	Fresh fruit & vegetables	N
2380pv1	Toffee w chocolate	Snacks	Y
2381pv1	Pate spreadable Linera	Processed meat products	Y
2382pv1	Bread brown w sunflower seeds	Bread	Y
2383pv1	Nougat w chocolate	Snacks	Y
2384pv1	Liquorice w peppermint	Snacks	Y
2385pv1	Liquorice w sal ammoniac powder	Snacks	Y
2386pv1	Nougat	Snacks	Y
2387pv1	Popcorn sweet puffed	Snacks	Y
2388pv1	Fruit drink conc with 10-15 mg vit C	Beverages	Y
2389pv1	Fruit drink conc can Albert Heijn	Beverages	Y
238pv1	Crackers matzes	Bread	Y
2390pv1	Fruit drink conc with 15-20 mg vit C	Beverages	Y
2391pv1	Cake marble-	Snacks	Y
2392pv1	Cake apple-	Snacks	Y
2393pv1	Cake raisins-	Snacks	Y
2394pv1	Eclair filled w banana and whipped cream	Snacks	Y
2395pv1	Chocolate eclair	Snacks	Y
2396pv1	Chocolate pastry w whipped cream	Snacks	Y
2397pv1	Cake Dutch spiced Ontbijtkoek w nuts	Snacks	Y
2398pv1	Cake Dutchspiced Ontbijtkoek w rockcandy	Snacks	Y
2399pv1	Spiced cake Indonesian- Spekkoek	Snacks	Y
2400pv1	Croissant chocolate-	Snacks	Y
2401pv1	Tarts filled with jam	Snacks	Y
2402pv1	Capers	Fresh fruit & vegetables	Y
2403pv1	Cup cake iced	Snacks	Y
2404pv1	Cake Dutch spiced w sunflowerseeds	Snacks	Y
2405pv1	Chocolate chip cookie	Snacks	Y
2406pv1	Biscuit children's average	Snacks	Y
2407pv1	Biscuit fortified Provita milkbiscuit	Snacks	Y
2408pv1	Biscuit fortified Bridge fruit and grain	Snacks	Y
2409pv1	Biscuit Dutch shortbread w chocolate	Snacks	Y
240pv1	Cake Dutch spiced Ontbijtkoek	Snacks	Y
2410pv1	Teacakes chocolate coated marshmellow	Snacks	Y
2411pv1	Minced meat (50:50 pork beef) w veg raw	Fresh meat	N
2411pv1.25	Minced meat (50:50 pork beef) w veg raw	Fresh meat	N
2411pv1.33333333333333	Minced meat (50:50 pork beef) w veg raw	Fresh meat	N
2412pv1	Gingersnap	Snacks	Y
2413pv1	Cake wrapped in marzipan and chocolate	Snacks	Y
2414pv1	Biscuit fortified Bridge milkbiscuit	Snacks	Y
2415pv1	Cocoa product sweetened Nesquik Hot Choc	Beverages	Y
2416pv1	Ice cream stracciatella-	Snacks	Y
2417pv1	Cake Dutch w icing & cream 'Oranjekoek'	Snacks	Y
2418pv1	Sauce hot liquid ready made <12% fat	Meal sauces	Y
2419pv1	Sauce cheese-	Meal sauces	Y
241pv1	Bread white milk based	Bread	Y
2420pv1	Sauce hot liquid ready made >12% fat	Meal sauces	Y
2421pv1	Sauce Chicken Tonight low fat varieties	Meal sauces	Y
2422pv1	Low fat margarine prod Becel Omega3 Plus	Oils, fats & fat spreads	Y
2423pv1	Low fat margarine prod Blue Band Idee	Oils, fats & fat spreads	Y
2424pv1	Chocolate confetti white	Bread toppings	Y
2425pv1	Wafer galette	Snacks	Y
2426pv1	Mashed potatoes prep w water wo fat	Processed potatoe, pasta, rice	N
2427pv1	Spice biscuit sprinkles Bolletje	Snacks	Y
2428pv1	Wafer w milk & hazelnts Knoppers	Snacks	Y
2429pv1	Cake w nuts	Snacks	Y
242pv1	Bread rye dark	Bread	Y
2430pv1	Fritter banana	Snacks	Y
2431pv1	Gateau fatless sponge w marzipan	Snacks	Y
2432pv1	Cake with nuts	Snacks	Y
2433pv1	Rice drink Rice Dream Ca+	Beverages	Y
2434pv1	Juice drink Wicky	Beverages	Y
2435pv1	Soft drink w sugar & sweetner 2-<5 g KH	Beverages	Y
2436pv1	Juice drink w sugar & sw	Beverages	Y
2437pv1	Juice drink multivitamin Caprisonne	Beverages	Y
2438pv1	Fruit drink conc diluted average	Beverages	Y
2439pv1	Fruit drink conc w sugar diluted AH	Beverages	Y
243pv1	Bread rye light	Bread	Y
2440pv1	Fruit drink conc diluted 1 to 4	Beverages	Y
2441pv1	Fruit drink conc diluted1 to 7	Beverages	Y
2442pv1	Fruit dr conc Lessini light diluted aver	Beverages	Y
2443pv1	Sport drink River Powerdrink/Freeway	Beverages	Y
2444pv1	Tea herbal instant sw prepared	Beverages	Y
2445pv1	Sauce butter-	Sauces emulsions	Y
2447pv1	Sauce veg w semi-skimmed milk and maize	Sauces emulsions	Y
2448pv1	Sauce powder approx 30% fat	Sauces emulsions	Y
2449pv1	Gravy 25% fat clear prep w gravypowder	Meal sauces	Y
244pv1	Bread raisin	Bread	Y
2450pv1	Gravy 50% fat prepared w gravypowder	Meal sauces	Y
2451pv1	Gravy 25% fat thickend prep w gravypowde	Meal sauces	Y
2452pv1	Gravy 25% fat thick prep wo gravypowder	Meal sauces	Y
2453pv1	Gravy 50% fat thick prep wo gravypowder	Meal sauces	Y
2454pv1	Gravy 75% fat thick prep wo gravypowder	Meal sauces	Y
2455pv1	Sauce Aardappel Anders average	Meal sauces	Y
2456pv1	Gravy 5% fat thick prep wo gravypowder	Meal sauces	Y
2457pv1	Peanutsauce homemade w s-sk milk wo fat	Meal sauces	Y
2458pv1	Peanutsauce homemade w water milk wo fat	Meal sauces	Y
2459pv1	Gravy 50% fat clear prep wo gravypowder	Meal sauces	Y
2460pv1	Gravy 75% fat clear prep wo gravypowder	Meal sauces	Y
2461pv1	Gravy 50%fat thickend prep w gravypowder	Meal sauces	Y
2462pv1	Gravy 5% fat clear prep wo gravypowder	Meal sauces	Y
2463pv1	Sauce worcester-	Sauces water based	Y
2464pv1	Sauce powder approx 10% fat	Sauces water based	Y
2465pv1	Salad dressing Yofresh	Sauces emulsions	Y
2466pv1	Salad dressing vinaigrette	Sauces emulsions	Y
2467pv1	Salad dressing./sauce approx 13% oil	Sauces emulsions	Y
2468pv1	Salad dressing honey/mustard	Sauces emulsions	Y
2469pv1	Sauce mayonnaise based average	Sauces emulsions	Y
246pv1	Bread wholemeal average	Bread	Y
2470pv1	Sauce for chips 5% oil	Sauces water based	Y
2471pv1	Mayonnaise product approx 35% oil	Sauces emulsions	Y
2472pv1	Oil wok average	Oils, fats & fat spreads	N
2473pv1	Herb paste boemboe	Meal sauces	Y
2474pv1	Whitefish fillet batter deepfried wo fat	Processed fish products	Y
2475pv1	Salmon pate/-mousse	Processed fish products	Y
2476pv1	Cappuccino freshly made	Beverages	Y
2477pv1	Coffee cappuccino instant prepared	Beverages	Y
2478pv1	Cappuccino instant powder	Beverages	Y
2479pv1	Fruit drink conc Roosvicee diluted aver	Beverages	Y
2480pv1	Energy drink Golden Power/Bullit	Beverages	Y
2481pv1	Fruit juice dk Roosvicee Spongebob	Beverages	Y
2482pv1	Fruit drink conc fruitmix diluted averag	Beverages	Y
2483pv1	Fruit juice drink ACE average	Beverages	Y
2484pv1	Fruit drink conc light diluted average	Beverages	Y
2485pv1	Fruitdrink conc 10-15 mg vitC diluted av	Beverages	Y
2486pv1	Fruitdrink conc KarvanCevitam diluted av	Beverages	Y
2487pv1	Soup veg & meat based ready made prep	Soups	Y
2488pv1	Soup vegetable&meat based prepared pack	Soups	Y
2489pv1	Spread speculaas flavoured	Bread toppings	Y
248pv1	Bread white water based	Bread	Y
2490pv1	Fruit juice drink 12fruit nectar light	Beverages	Y
2491pv1	Fruit juicedrink w sweetener 5-<8g CHO	Beverages	Y
2492pv1	Lemonade fruit Wicky light	Beverages	Y
2494pv1	Bread Blue Band Goede Start light brown	Oils, fats & fat spreads	Y
2495pv1	Drinking chocolate w s-sk milk	Beverages	Y
2496pv1	Dairy drink Campina fruitmilk	Milk products	Y
2497pv1	Milkshake McDonald	Milk products	Y
2498pv1	Tomatoes sieved	Processed fruit & vegetables	Y
249pv1	Bread wheat malt Tarvo	Bread	Y
2500pv1	Drinking chocolate w s-sk milk +Nesquik	Beverages	Y
2501pv1	Yoghurt half fat w fruit	Milk products	Y
2502pv1	Yoghurt drink Topvit w sweetner	Milk products	Y
2503pv1	Yoghurt Greek full fat	Milk products	Y
2504pv1	Fromage frais full fat w fruit	Milk products	Y
2505pv1	Fruit dried in brandy	Alcohol	Y
2506pv1	Juice vegetable/fruit Knorr Vie average	Juice	Y
2507pv1	Juice multifruit	Juice	Y
2508pv1	Fruit juice drink ACE Aldi/Kruidvat	Beverages	Y
2509pv1	Juice drink Sisi Fruitmania Smooth peach	Beverages	Y
250pv1	Almond filled pastry	Snacks	Y
2510pv1	Juice drink Sisi Fruitmania Smooth berry	Beverages	Y
2511pv1	Juice fruit Solevita multivit 12-fruits	Juice	Y
2512pv1	Fruit juice drink Fruity King tropical	Beverages	Y
2513pv1	Cider	Alcohol	Y
2514pv1	Fruit juice concentrated prepared	Juice	Y
2515pv1	Fruit juice dk Surango multivit light	Juice	Y
2516pv1	Cheese spread Eru Balans	Cheese -products	Y
2517pv1	Cheese spread Eru kids	Cheese -products	Y
2518pv1	Cheese goat hard	Cheese -products	Y
2519pv1	Custard half fat all flavours	Milk products	Y
251pv1	Apple pie Dutch w shortbread w marg	Snacks	Y
2520pv1	Pudding airy average	Milk products	Y
2521pv1	Porridge milk w flour Lammetjespap	Milk products	Y
2522pv1	Custard 2 flavours w syrup vlaflip	Milk products	Y
2523pv1	Custard vanilla full fat w choc balls	Milk products	Y
2524pv1	Chili pepper raw	Fresh fruit & vegetables	N
2524pv1.11111111111111	Chili pepper raw	Fresh fruit & vegetables	N
2524pv1.17647058823529	Chili pepper raw	Fresh fruit & vegetables	N
2525pv1	Frying fat horeca	Oils, fats & fat spreads	N
2526pv1	Gravy 25% fat thickened w gravypowder	Meal sauces	Y
2527pv1	Biscuit savoury Sultana	Snacks	Y
2528pv1	Croutons	All other products	Y
2529pv1	Potato crisps oven baked	Snacks	Y
252pv1	Biscuit sweet	Snacks	Y
2530pv1	Maltesers	Snacks	Y
2531pv1	Chocolate flakes average	Snacks	Y
2532pv1	Liquorice sugarfree	Snacks	Y
2533pv1	Wine gum w liquorice	Snacks	Y
2534pv1	Fruitdrink conc sugar and sw 5-10 g CHO	Beverages	Y
2535pv1	Cocoa powder sweetened Nesquik plus	Snacks	Y
2536pv1	Yoghurt & custard Campina	Milk products	Y
2537pv1	Dessert made of custard, yoghurt & syrup	Milk products	Y
2538pv1	Blancmange home-made w semi-sk milk	Milk products	Y
2539pv1	Custard soft & airy Campina	Milk products	Y
253pv1	Cake wo butter	Snacks	Y
2540pv1	Soup noodle prepared	Soups	Y
2541pv1	Sausage luncheon meat vegetarian	Processed meat products	Y
2542pv1	Pate vegetarian	Processed meat products	Y
2543pv1	Crisps based on soya Socrispy	Snacks	Y
2544pv1	Ham vegetarian	Processed meat products	Y
2545pv1	Meal replacer mlkshk prep s-sk milk	Milk products	Y
2546pv1	Meal replacer milkshake powder Herbalife	Milk products	Y
2547pv1.05263157894737	Chines noodle ball unprepared	Processed meat products	Y
2548pv1.11111111111111	Croquette meat ragout frozen unprep	Processed meat products	Y
2548pv1.17647058823529	Croquette meat ragout frozen unprep	Processed meat products	Y
2549pv1.17647058823529	Springroll frozen unprepared	Processed meat products	Y
254pv1	Cake sponge Dutch Eierkoek	Snacks	Y
2550pv1	Wrap shoarma roll prep wo fat	Snacks	Y
2551pv1	Croissant w ham and cheese	Snacks	Y
2552pv1	Chicken sticks breaded	Snacks	Y
2552pv1.11111111111111	Chicken sticks breaded	Snacks	Y
2553pv1	Cheese pasty w puff pastry	Snacks	Y
2554pv1	Roll white w cheese	Snacks	Y
2555pv1.11111111111111	Viandel unprepared Mora	Snacks	Y
2556pv1	Biscuit fortified LU Time Out	Snacks	Y
2557pv1	Margarine 80% fat > 24 g sat unsalted	Oils, fats & fat spreads	Y
2558pv1	Margarine liq 80% fat < 17g sat unsalted	Oils, fats & fat spreads	Y
2559pv1	Low fat margarine prod AH Bewust light	Oils, fats & fat spreads	Y
255pv1	Gateau with whipped cream	Snacks	Y
2560pv1	Apple turnover	Snacks	Y
2561pv1	Soup thickened no filling	Soups	Y
2562pv1	Cooking fat liq 97%fat <17g sat unsalted	Oils, fats & fat spreads	Y
2563pv1	Cooking fat sol 97% fat>17g sat unsalted	Oils, fats & fat spreads	Y
2564pv1	Juice fruit Hero Fruit&Co	Juice	Y
2565pv1	Margarine 80% fat 17-24g sat unsalted	Oils, fats & fat spreads	Y
2566pv1	Low fat marg 40% fat <17g sat unsalted	Oils, fats & fat spreads	Y
2567pv1	Low fat margarineproduct AH chol verl	Oils, fats & fat spreads	Y
2568pv1	Flan w custard and crumble topping	Snacks	Y
2569pv1	Cake Dutch Ontbijtkoek w nuts&fruit	Snacks	Y
256pv1	Gateau with butter-cream filling	Snacks	Y
2570pv1	Flan w custard and fruit	Snacks	Y
2571pv1	Cake with 'bitterkoekjes'	Snacks	Y
2572pv1	Biscuit fortified milk Perfekt/Plus	Snacks	Y
2573pv1	Sauce garlic 20% oil	Sauces emulsions	Y
2574pv1	Potatoes mshed w s-sk milk + butter	Processed potatoe, pasta, rice	Y
2575pv1	Potatoes mashed w whole milk + margarine	Processed potatoe, pasta, rice	Y
2576pv1	Potatoes mashed w s-sk milk + halvarine	Processed potatoe, pasta, rice	Y
2577pv1	Cake made w butter and apple	Snacks	Y
2578pv1	Pancake prep w sunflower oil	Grains and cereals	Y
2579pv1	Pancake prep w olive oil	Grains and cereals	Y
257pv1	Almond paste filled tarts average	Snacks	Y
2580pv1	Gravy 5% fat thickend w gravy powder	Meal sauces	Y
2581pv1	Pancake wholemeal prep w marg liq 2077	Grains and cereals	Y
2582pv1	Pancake wholemeal	Grains and cereals	Y
2583pv1	Biscuit peanut	Snacks	Y
2584pv1	Sauce prep w s-sk milk en marg 2063/2062	Sauces emulsions	Y
2585pv1	Gravy 25% fat w cooking fat 2067	Meal sauces	Y
2586pv1	Gravy 25% fat w margarine 2063	Meal sauces	Y
2587pv1	Gravy 25% fat w margarine liq 2077	Meal sauces	Y
2588pv1	Gravy 25% fat clear prep w gravy powder	Meal sauces	Y
2589pv1	Gravy 25% fat w olive oil	Meal sauces	Y
258pv1	Biscuits averaged	Snacks	Y
2590pv1	Gravy 25% fat w butter	Meal sauces	Y
2591pv1	Gravy 25% fat w blue band finesse	Meal sauces	Y
2592pv1	Gravy 50% fat w cooking fat 2067	Meal sauces	Y
2593pv1	Gravy 50% fat w margarine 2063	Meal sauces	Y
2594pv1	Gravy 50% fat w margarine liq 2077	Meal sauces	Y
2595pv1	Candybar KitKat	Snacks	Y
2596pv1	Gravy 75% fat w margarine 2063	Meal sauces	Y
2597pv1	Yoghurt drink Optifit	Milk products	Y
2598pv1	Gravy 75% fat w cooking fat 2067	Meal sauces	Y
2599pv1	Gravy 75% fat w margarine liq 2077	Meal sauces	Y
259pv1	Macaroons	Snacks	Y
25pv1	Cabbage green boiled	Processed fruit & vegetables	N
2600pv1	Gravy 25% fat thickend w marg 2063	Meal sauces	Y
2601pv1	Gravy 25% fat thickend w cook fat 2067	Meal sauces	Y
2602pv1	Gravy 25% fat thickend w olive oil	Meal sauces	Y
2603pv1	Gravy 25% fat w marg 2063 + gravy powder	Meal sauces	Y
2604pv1	Optimel control	Milk products	Y
2605pv1	Salad dressing olive oil-vinegar	Sauces water based	Y
2606pv1	Mix for marinade powder unprepared	Sauces water based	Y
2607pv1	Biscuit w nuts and chocolate	Snacks	Y
2608pv1	Biscuit childrens Smoeltje fruit	Snacks	Y
2609pv1	Biscuits with nuts	Snacks	Y
260pv1	Biscuit sponge fingers	Snacks	Y
2610pv1	Wine rose	Alcohol	Y
2611pv1	Sauce Joppie	Sauces emulsions	Y
2612pv1	Tapenade olive	Processed fruit & vegetables	Y
2613pv1	Mix seasoning Mexican unprepared	Sauces water based	Y
2614pv1	Ketchup salsa	Sauces water based	Y
2615pv1	Vinegar	All other products	Y
2616pv1	Burger vegetarian cheese unprepared	Processed meat products	Y
2617pv1	Bread stuffed Bapao meat	Filled sanwich & rolls	Y
2618pv1	Bread stuffed Bapao vegetarian mince	Filled sanwich & rolls	Y
2619pv1.11111111111111	Meatball Berenklauw unprepared	Processed meat products	Y
261pv1	Biscuit spiced Speculaas	Snacks	Y
2620pv1	Potatoes mashed inst w milk/water/marg	Processed potatoe, pasta, rice	Y
2621pv1	Potatoes mashed w milk & liquid fat 2066	Processed potatoe, pasta, rice	Y
2622pv1	Appel pie Dutch w shortbread w butter	Snacks	Y
2623pv1	Sauce Chicken Tonight high fat varieties	Meal sauces	Y
2624pv1	Gravy 25% fat w margarine liquid 2558	Meal sauces	Y
2625pv1	Gravy 25% fat w cooking fat 2563	Meal sauces	Y
2626pv1	Gravy 25% fat w cooking fat liq 2562	Meal sauces	Y
2627pv1	Gravy 50% fat w margarine liquid 2558	Meal sauces	Y
2628pv1	Gravy 50% fat w cooking fat liquid 2562	Meal sauces	Y
2629pv1	Gravy 50% fat w cooking fat 2563	Meal sauces	Y
262pv1	Biscuit Dutch shortbread spritsstukken	Snacks	Y
2630pv1	Gravy 50% fat w olive oil	Meal sauces	Y
2631pv1	Gravy 75% fat w olive oil	Meal sauces	Y
2632pv1	Gravy 75% fat w cooking fat 2563	Meal sauces	Y
2633pv1	Coffee instant powder	Beverages	Y
2634pv1	Fruit juice dk minimal 2 fruits w vit C	Juice	Y
2635pv1	Fruit juice drink diary Wicky fruitzacht	Beverages	Y
2636pv1	Fruit juice dk Solevita multivit 12 fru	Juice	Y
2637pv1	Fruit juice dk Roosvicee Multivit light	Beverages	Y
2638pv1	Fruit juice dk ACE Fruxano/Super/Tasting	Beverages	Y
2639pv1	Smoothie fruit	Juice	Y
263pv1	Biscuit brown/wholemeal	Snacks	Y
2640pv1	Smoothie fruit w dairy	Beverages	Y
2641pv1	Soft drink w sugar,sw&caffeine 2-<5 carb	Beverages	Y
2642pv1	Fruit drink conc prepared 15-20mg vit C	Beverages	Y
2643pv1	Fruit drink conc w sugar & sw diluted	Beverages	Y
2644pv1	Fruit drink Roosvicee 50/50	Beverages	Y
2645pv1	Sports drink Albert Heijn	Beverages	Y
2646pv1	Sports drink Aquarius	Beverages	Y
2647pv1	Coffee w sugar and milk vending machine	Beverages	Y
2648pv1	Coffee w milk vending machine	Beverages	Y
2649pv1	Tea herbal instant powder	Beverages	Y
264pv1	Biscuit salted average	Snacks	Y
2650pv1	Gravy no fat prep w gravy powder	Meal sauces	Y
2651pv1	Sauce cocktail/party/table >25% oil	Sauces emulsions	Y
2652pv1	Corn flakes Golden Bridge	Breakfast cereals	Y
2653pv1	Rice cakes w spices	Snacks	Y
2654pv1	Sandwich meat chicken	Processed meat products	Y
2655pv1	Yoghurt 0% fat w fruit Activia	Milk products	Y
2656pv1	Chocolate confetti mix white and plain	Bread toppings	Y
2657pv1	Spread duo w chocolate	Bread toppings	Y
2658pv1	Spread duo wo chocolate	Bread toppings	Y
2659pv1	Sweets jelly/gums/foam	Snacks	Y
265pv1	Puff pastry baked	Snacks	Y
2660pv1	Wine gums with foam layer	Snacks	Y
2661pv1	Waffle Luikse	Snacks	Y
2662pv1	Waffle soft-/sugar-/flash-	Snacks	Y
2663pv1	Juice fruit Vruchtoase multivit	Juice	Y
2664pv1	Lemonade fruit Sisi no bubbles Action	Beverages	Y
2665pv1	Softdrink w sugar,sw&caffeine 5-<8g carb	Beverages	Y
2666pv1	Spread chocolate Duo Penotti hazelnut	Bread toppings	Y
2667pv1	Salad dressing 20% oil w yogurt	Sauces emulsions	Y
2668pv1	Mix Maggi oven/dagschotel unprepared	Sauces water based	Y
2669pv1	Mix Maggi oven-/dagschotel prepared	Sauces water based	Y
266pv1	Snack sausage roll puff pastry	Snacks	Y
2670pv1	Mix Hollands Pannetje Maggi unprepared	Sauces water based	Y
2671pv1	Mix rice/Chines noodles unprepared	Sauces water based	Y
2672pv1	Energy drink Red Bull/Euroshopper/Rodeo	Beverages	Y
2673pv1	Energy drink Red Bull sugarfree	Beverages	Y
2674pv1	Energy drink Mxxed up	Beverages	Y
2675pv1	Muesli crunchy w nuts	Snacks	Y
2676pv1	Muesli crunchy w chocolate	Snacks	Y
2677pv1	Muesli crunchy w nuts and chocolate	Snacks	Y
2678pv1	Dairy spread plain/herbs	Cheese -products	Y
2679pv1	Dairy spread plain/herbs light	Cheese -products	Y
267pv1	Pretzel sticks	Snacks	Y
2680pv1	Fruit drink concentrated w 40 mg vit C	Beverages	Y
2681pv1	Mixed spices Wereldgerechten unprep	Sauces water based	Y
2682pv1	Rice multi-grain boiled	Processed potatoe, pasta, rice	N
2683pv1	Breakfast cereal Chocos Kellogg's	Breakfast cereals	Y
2684pv1	Breakfast product Spec K choc Kellogg's	Breakfast cereals	Y
2685pv1	Abricots dried and soaked	Fresh fruit & vegetables	N
2686pv1	Apple sauce wo sugar w sweetner tinned	Processed fruit & vegetables	Y
2687pv1	Biscuit spiced kruidnoten w plain choc	Snacks	Y
2688pv1	Biscuit spiced kruidnoten w milk choc	Snacks	Y
2689pv1	Actimel light	Milk products	Y
2690pv1	Coffee creamer low fat powder	Milk products	Y
2691pv1	Sweet fruity chew	Snacks	Y
2692pv1	Breakfast drink Ontbijt&Fit	Beverages	Y
2693pv1	Juice drink tea&fruit w sw & vit C	Beverages	Y
2694pv1	Juice drink Sisi Frizzr tropical	Beverages	Y
2695pv1	Fruit juice drink w soya Adez	Beverages	Y
2696pv1	Biscuit Dutch Amaretti Bitterkoekjes	Snacks	Y
2697pv1	Sugar light	All other products	Y
2698pv1	Cake chocolate made wo butter	Snacks	Y
2699pv1	Biscuit Dutch Frou frou	Snacks	Y
269pv1	Prawn crackers	Snacks	Y
26pv1	Celeriac boiled	Processed fruit & vegetables	N
2700pv1	Biscuit w dried fruit & yoghurt Yofruit	Snacks	Y
2701pv1	Biscuit spiced kruidnoten w white choc	Snacks	Y
2702pv1	Bread C1000 Kids Wit	Bread	Y
2703pv1	Bread wholemeal w seeds	Bread	Y
2704pv1	Bread brown w seeds	Bread	Y
2705pv1	Breakfast prod All-Bran flakes Kellogg's	Breakfast cereals	Y
2706pv1	Cassave crackers	Bread	Y
2707pv1	Bread corn w sunflower seeds	Bread	Y
2708pv1	Lettuce red raw	Fresh fruit & vegetables	N
2709pv1	Low fat margarine prod C1000 Goed begin	Oils, fats & fat spreads	Y
270pv1	Milk raw	Milk products	N
2710pv1	Cabbage red w apple pieces glass	Processed fruit & vegetables	Y
2711pv1	Margarine product AlbertHeijn Bewust	Oils, fats & fat spreads	Y
2712pv1	Margarine product liquid light unsalted	Oils, fats & fat spreads	Y
2713pv1	Margarine product liquid light	Oils, fats & fat spreads	Y
2714pv1	Biscuit fortified Evergreen crunchy	Snacks	Y
2715pv1	Meringue	Snacks	Y
2716pv1	Juice multivitamins Albert Heijn	Beverages	Y
2717pv1	Fruit juice dk Dr.Siemer multivit light	Beverages	Y
2718pv1	Fruit drink Linessa Vital&Active light	Beverages	Y
2719pv1	Biscuit Bridge ommetjes	Snacks	Y
271pv1	Coffee creamer with pufa Becel	Milk products	Y
2720pv1	Fruit drink conc diluted 40 mg vit C	Beverages	Y
2721pv1	Doughnuts iced	Snacks	Y
2722pv1	Waffle Luikse w chocolate	Snacks	Y
2723pv1	Fruitdrink conc w sugar &sw diluted Raak	Beverages	Y
2724pv1	Ice tea with less sugar	Beverages	Y
2725pv1	Milkdrink skimmed milk Becel pro-activ	Milk products	Y
272pv1	Milk chocolate-flavoured full fat	Milk products	Y
2731pv1	Tomato cherry raw	Fresh fruit & vegetables	N
2731pv1.25	Tomato cherry raw	Fresh fruit & vegetables	N
2732pv1	Tomato beef raw	Fresh fruit & vegetables	N
2733pv1	Tomato beef boiled	Processed fruit & vegetables	Y
2734pv1	Tomato average raw	Fresh fruit & vegetables	N
2735pv1	Tomato average boiled	Processed fruit & vegetables	N
2736pv1	Rocket raw	Fresh fruit & vegetables	N
2736pv1.42857142857143	Rocket raw	Fresh fruit & vegetables	N
2737pv1	Onion Welsh raw	Fresh fruit & vegetables	N
2738pv1	Onion Welsh boiled	Processed fruit & vegetables	N
2739pv1	Cucumber w skin raw	Fresh fruit & vegetables	N
273pv1	Milk chocolate-flavoured low fat	Milk products	Y
2740pv1	Sweet pepper yellow raw	Processed fruit & vegetables	N
2741pv1	Sweet pepper yellow boiled	Processed fruit & vegetables	N
2742pv1	Sweet pepper average raw	Fresh fruit & vegetables	N
2743pv1	Sweet pepper average boiled	Processed fruit & vegetables	N
2748pv1	Pear with skin	Fresh fruit & vegetables	N
274pv1	Coffee creamer powder	Milk products	Y
2755pv1	Juice orange freshly squeezed	Beverages	Y
275pv1	Coffee creamer semi-sk w veg oil Nutroma	Milk products	Y
2760pv1	Hot chocolate from vending machine	Beverages	Y
2761pv1	Almond paste filled tarts w butter	Snacks	Y
2763pv1	Biscuit spiced Speculaas w butter	Snacks	Y
2764pv1	Biscuit spiced Speculaas wo butter	Snacks	Y
2765pv1	Pangasius prep in microwave oven	Processed fish products	Y
2768pv1	Sausage raw beef	Processed meat products	Y
276pv1	Custard chocolate full fat	Milk products	Y
2775pv1	Biscuit digestive w chocolate	Snacks	Y
2776pv1	Flan apple and crumble topping	Snacks	Y
2777pv1	Flan hard shell with custard cream	Snacks	Y
2778pv1	Flan sponge with custard cream	Snacks	Y
277pv1	Milk skimmed condensed w sugar tinned	Milk products	Y
2785pv1	Bread corn	Bread	Y
2788pv1	Bread sourdough wholemeal	Bread	Y
2789pv1	Bread ciabatta no filling	Bread	Y
278pv1	Yoghurt full fat	Milk products	Y
2790pv1	Bread pita white	Bread	Y
2793pv1	Baguette white	Bread	Y
2794pv1	Baguette brown	Bread	Y
2795pv1	Roll white hard	Bread	Y
2796pv1	Roll brown hard	Bread	Y
2797pv1	Roll brown soft	Bread	Y
2798pv1	Roll wholemeal soft	Bread	Y
279pv1	Milk whole	Milk products	N
27pv1	Cucumber wo skin raw	Fresh fruit & vegetables	N
2801pv1	Croissant prepared w butter	Bread	Y
2802pv1	Croissant prepared wo butter	Bread	Y
2803pv1	Bun currant/raisin	Bread	Y
2804pv1	Bun wholemeal w muesli	Bread	Y
2806pv1	Pumpkin seeds	All other products	N
2809pv1	Muesli w fruit	Breakfast cereals	Y
280pv1	Coffee creamer full fat	Milk products	Y
2810pv1	Waffle syrup w/o butter	Snacks	Y
2813pv1	Bread raisin/current average	Bread	Y
2816pv1	Bread Tijger white	Bread	Y
2817pv1	Stollen w almond/imitat paste average	Bread	Y
2818pv1	Croissant average	Bread	Y
281pv1	Milk full fat condensed w sugar tinned	Milk products	Y
2820pv1	Waffle syrup w butter	Snacks	Y
2821pv1	Bread brown w pumpkin seeds	Bread	Y
2822pv1	Yoghurt low fat with fruit with sweetene	Milk products	Y
2823pv1	Yoghurt full fat stracciatella	Milk products	Y
2824pv1	Cheese 30+ low salt	Cheese -products	Y
2825pv1	Juice drink Dubbelfrisss less sugar	Beverages	Y
2826pv1.25	Chicken schnitzel satey breaded raw	Processed meat products	Y
2827pv1.25	Pork schnitzel sate breaded raw	Processed meat products	Y
2828pv1	Liqueur with cream 15-25 vol% alcohol	Alcohol	Y
2829pv1	Chocolate bar filled Kinder	Snacks	Y
282pv1	Custard vanilla full fat	Milk products	Y
2830pv1	Croissant with cheese	Filled sanwich & rolls	Y
2831pv1	Fruitdrink conc w sugar & sw 10-15 g CHO	Beverages	Y
2832pv1	Cake chocolate made w butter	Snacks	Y
2833pv1	Gravy 50% fat w cooking fat 2067	Meal sauces	Y
2834pv1.25	Potato waffels/balls frozen unprepared	Processed potatoe, pasta, rice	Y
2835pv1	Coffee iced	Beverages	Y
2836pv1	Sausage grill w cheese	Processed meat products	Y
2837pv1	Beer with fruit flavour	Alcohol	Y
2838pv1	Fruitdrink conc w sug&sw diluted Tasting	Beverages	Y
2839pv1	Meal replacer Cambridge shake/soup prep	All other products	Y
2840pv1	Cabbage red w apple pieces	Processed fruit & vegetables	Y
2841pv1	Fruit drink Coolbest Vitaday light	Juice	Y
2842pv1	Fruit drink Coolbest Powerfruit	Juice	Y
2843pv1	Pineapple in own juice tinned	Processed fruit & vegetables	Y
2843pv1.11111111111111	Pineapple in own juice tinned	Processed fruit & vegetables	Y
2844pv1	Nuts macadamia	Snacks	Y
2845pv1	Fruitsnack Fruit'n fun	Snacks	Y
2846pv1	Whey drink Taksi w sweetener	Beverages	Y
2847pv1	Fruit drink light AH multivit red fruit	Beverages	Y
2848pv1	Mineral water w sweetener and vitamins	Beverages	Y
2849pv1	Low fat marg product Becel calorie light	Oils, fats & fat spreads	Y
284pv1	Yoghurt low fat with fruit	Milk products	Y
2850pv1	Low fat spread Becel pro-activ bloeddruk	Oils, fats & fat spreads	Y
2851pv1	Juice multifruit mild w vit C	Juice	Y
2852pv1	Low fat spread Dieetella Double Activ	Beverages	Y
2853pv1	Yoghurt with fruit Mona Boordevol	Milk products	Y
2854pv1	Fruit drink light Papaya multivitamins	Beverages	Y
2855pv1	Juice drink Sisi Fruitmania tropic/smoot	Beverages	Y
2856pv1	Fruit juice Vitafit multifruits	Juice	Y
2857pv1	Sportdrink Fitness	Beverages	Y
2858pv1	Milk soya natural Fresh light Alpro	Beverages	Y
2859pv1	Pancake with cheese	Grains and cereals	Y
285pv1	Coffee creamer half fat	Milk products	Y
2860pv1	Ragout pasty w puff pastry	Processed meat products	Y
2861pv1	Prodimed powder	All other products	Y
2862pv1	Pancake with apple and raisin	Grains and cereals	Y
2863pv1	Pie apple-nuts	Snacks	Y
2864pv1	Biscuit syrup with chocolate	Snacks	Y
2865pv1	Bread Omega-	Bread	Y
2866pv1	Juice Appelsientje Superfruit pomegranat	Juice	Y
2867pv1	Mashed potatoes w water and margarine	Processed potatoe, pasta, rice	Y
2868pv1	Pancake prep w marg liquid 2077	Grains and cereals	Y
2869pv1	Fritter apple	Snacks	Y
286pv1	Milk semi-skimmed	Milk products	N
2870pv1	Candybar Lion	Snacks	Y
2871pv1	Gravy 25% fat w marg 2077 + gravypowder	Meal sauces	Y
2872pv1	Gravy 25% fat w marg 2558 + gravy powder	Meal sauces	Y
2873pv1	Saus caramel for pudding	Sauces water based	Y
2874pv1	Mix rice/Chines noodles prepared	Processed potatoe, pasta, rice	Y
2875pv1	Fruitsnack Knijpfruit	Processed fruit & vegetables	Y
2876pv1	Bread brioche	Bread	Y
2877pv1	Breakfast product Weetabix original	Breakfast cereals	Y
2878pv1	Low fat margarine product Gezonde Start	Oils, fats & fat spreads	Y
2879pv1	Sport drink Freeway Sportivo	Beverages	Y
2880pv1	Coffee wiener melange instant powder	Beverages	Y
2881pv1	Coffee wiener melange instant prepared	Beverages	Y
2882pv1	Meal replacer bar Weightcare	All other products	Y
288pv1	Porridge oatmeal	Milk products	Y
289pv1	Buttermilk	Milk products	N
28pv1	Cucumber boiled	Processed fruit & vegetables	N
2917pv1	Dairy drink Milk&Fruit mango	Milk products	Y
2923pv1	Crisps potato unflavoured	Snacks	Y
2924pv1	Crisps potato flavoured	Snacks	Y
2925pv1	Mascarpone cheese	Cheese -products	Y
2926pv1	Crisps potato light flavoured	Snacks	Y
2927pv1	Crisps potato straws natural	Snacks	Y
2928pv1	Crisps potato straws flavoured	Snacks	Y
2929pv1	Crisps potato Lays Sensations flavoured	Snacks	Y
292pv1	Coffee creamer low fat	Milk products	Y
2930pv1	Chocolate spread white	Bread toppings	Y
2932pv1	Soup cup-a-soup prepared	Soups	Y
2933pv1	Sponge cake wholemeal	Snacks	Y
2934pv1	Low fat spead Becel pro.activ light	Oils, fats & fat spreads	Y
2935pv1	Yoghurt full fat natural Activia	Milk products	Y
2936pv1	Breakfast drink Activia Start	Milk products	Y
2937pv1	Toast Melba natural	Snacks	Y
2938pv1	Toast Melba other varieties	Snacks	Y
293pv1	Coffee creamer 20% fat	Milk products	Y
2940pv1	Breakfast drink Breaker Breakfast	Milk products	Y
2941pv1	Breakfast drink Goede Morgen fruit	Milk products	Y
294pv1	Milk skimmed	Milk products	N
2951pv1.05263157894737	Nuggets vegetarian	Processed meat products	Y
2956pv1	Prunes dried soaked in water	Fresh fruit & vegetables	N
2957pv1	Fruit mixed dried soaked in water	Fresh fruit & vegetables	N
295pv1	Milk skimmed dried	Milk products	Y
296pv1	Milk whole dried	Milk products	Y
298pv1	Porridge rice	Milk products	Y
2994pv1.05263157894737	Falafel unprepared	Processed fruit & vegetables	Y
2995pv1	Cheese spread 45+	Cheese -products	Y
2996pv1	Sausage Chorizo	Processed meat products	Y
2997pv1	Sausage grill	Processed meat products	Y
299pv1	Cream whipping	Milk products	Y
29pv1	Swede boiled	Processed fruit & vegetables	N
3001pv1	Sandwich meat turkey	Processed meat products	Y
3002pv1	Bacon smoked Katenspek	Processed meat products	Y
3002pv1.66666666666667	Bacon smoked Katenspek	Processed meat products	Y
3003pv1	Sausage beef frankfurter type tinned	Processed meat products	Y
3004pv1	Milk chocolate-flavoured w sw Optimel	Milk products	Y
3005pv1	Breakfast drink Goede Morgen light	Milk products	Y
3007pv1	Bread low in carbohydrates	Bread	Y
3009pv1	Shandy	Beverages	Y
300pv1	Yoghurt whole milk Bulgarian	Milk products	Y
3016pv1.42857142857143	Veal schnitzel not breaded raw	Fresh meat	N
3017pv1.53846153846154	Minced veal raw	Fresh meat	N
3019pv1.42857142857143	Veal frying steak raw	Fresh meat	N
3019pv1.53846153846154	Veal frying steak raw	Fresh meat	N
301pv1	Yoghurt low fat	Milk products	Y
3024pv1.42857142857143	Pork stewing meat raw	Fresh meat	N
3025pv1	Bacon lean smoked raw	Processed meat products	Y
3025pv1.42857142857143	Bacon lean smoked raw	Processed meat products	Y
3025pv1.66666666666667	Bacon lean smoked raw	Processed meat products	Y
3027pv1	Pork shoarma seasoning raw	Processed meat products	Y
3027pv1.33333333333333	Pork shoarma seasoning raw	Processed meat products	Y
3027pv1.42857142857143	Pork shoarma seasoning raw	Processed meat products	Y
3030pv1.05263157894737	Sausage beef Braadworst raw	Processed meat products	Y
3030pv1.11111111111111	Sausage beef Braadworst raw	Processed meat products	Y
3030pv1.33333333333333	Sausage beef Braadworst raw	Processed meat products	Y
3031pv1	Pork sparerib raw	Fresh meat	N
3031pv1.33333333333333	Pork sparerib raw	Fresh meat	N
3031pv1.42857142857143	Pork sparerib raw	Fresh meat	N
3033pv1.25	Beef T-bone steak raw	Fresh meat	N
3033pv1.42857142857143	Beef T-bone steak raw	Fresh meat	N
3036pv1	Gravy 75%fat thick prep w gravy powder	Meal sauces	Y
3037pv1	Gravy 75% fat clear prep w gravy powder	Meal sauces	Y
303pv1	Ice cream dairy cream based	Snacks	Y
3040pv1.06382978723404	Vegetarian prod w cheese Valess unprep	Processed meat products	Y
3041pv1.06382978723404	Vegetarian product filled filet Valess	Processed meat products	Y
304pv1	Cheese Swiss dried	Cheese -products	Y
305pv1	Fromage frais low fat	Milk products	Y
306pv1	Fromage frais half fat	Cheese -products	Y
307pv1	Fromage frais full fat	Cheese -products	Y
308pv1	Oil peanut	Oils, fats & fat spreads	N
30pv1	Kohlrabi boiled	Processed fruit & vegetables	N
310pv1	Butter unsalted	Oils, fats & fat spreads	Y
312pv1	Oil corn	Oils, fats & fat spreads	N
313pv1	Oil soya	Oils, fats & fat spreads	N
314pv1	Lard	Oils, fats & fat spreads	N
317pv1	Oil sunflower seed	Oils, fats & fat spreads	N
319pv1	Corned beef	Processed meat products	Y
31pv1	Sweet pepper green raw	Fresh fruit & vegetables	N
322pv1	Sausage Dutch Frikandel deep-fried	Processed meat products	Y
324pv1	Sausage smoked cooked average	Processed meat products	Y
326pv1	Croquette meat ragout deep-fried	Processed meat products	Y
328pv1	Ham smoked raw	Processed meat products	Y
32pv1	Sweet pepper green boiled	Processed fruit & vegetables	N
330pv1.42857142857143	Turkey raw	Fresh meat	N
333pv1	Liver ox boiled	Processed meat products	Y
334pv1	Liver pork boiled	Processed meat products	Y
335pv1	Liver pate	Processed meat products	Y
336pv1	Luncheon meat tinned	Processed meat products	Y
338pv1	Beef salted cooked	Processed meat products	Y
339pv1.33333333333333	Venison raw	Fresh meat	N
33pv1	Raisins dried	Fresh fruit & vegetables	N
340pv1	Beef smoke-dried	Processed meat products	Y
343pv3.33333333333333	Bacon fat raw	Fresh meat	Y
344pv1	Processed meat products average	Processed meat products	Y
347pv1	Kipper smoked	Processed fish products	Y
348pv1	Shrimps Dutch peeled boiled	Processed fish products	Y
349pv1	Herring fillet in tomato sauce tinned	Processed fish products	Y
350pv1	Herring salted	Processed fish products	Y
351pv1	Crab in water tinned	Processed fish products	Y
352pv1	Lobster boiled	Processed fish products	Y
354pv1	Oysters	Processed fish products	Y
355pv1	Sardines/pilchards in oil tinned	Processed fish products	Y
358pv1	Eggs chicken white raw	Fresh meat	N
368pv1	Chinese noodle dish Bami goreng tinned	Main Dish	Y
369pv1	Spring roll fried	Snacks	Y
369pv1.11111111111111	Spring roll fried	Snacks	Y
36pv1	Purslane boiled	Processed fruit & vegetables	N
374pv1	Sugar brown Basterdsuiker	All other products	Y
375pv1	Sugar white Basterdsuiker	All other products	Y
376pv1	Syrup golden	Bread toppings	Y
377pv1	Sugar granulated	All other products	Y
37pv1	Leek boiled	Processed fruit & vegetables	N
381pv1	Syrup sugar	Bread toppings	Y
382pv1	Advocaat liqueur	Alcohol	Y
383pv1	Juice apple	Juice	Y
385pv1	Fruit juice drink redcurrent	Beverages	Y
386pv1	Gin Dutch red currant flavoured	Alcohol	Y
387pv1	Fruit drink blackcurrant	Beverages	Y
388pv1	Juice redcurrant	Juice	Y
389pv1	Beer brown	Alcohol	Y
38pv1	Turnip tops raw	Fresh fruit & vegetables	N
390pv1	Beer pilsner	Alcohol	Y
391pv1	Brandy	Alcohol	Y
392pv1	Campari	Alcohol	Y
394pv1	Cognac	Alcohol	Y
395pv1	Soft drink cola with caffeine	Beverages	Y
396pv1	Juice grape	Juice	Y
398pv1	Mineral water Evian	Water	N
399pv1	Fruit juice drink raspberry	Beverages	Y
400pv1	Soft drink wo caffeine	Beverages	Y
401pv1	Gin young Dutch	Alcohol	Y
402pv1	Gin old Dutch	Alcohol	Y
403pv1	Liqueur 15-25 vol% alcohol	Alcohol	Y
405pv1	Muscatel	Alcohol	Y
406pv1	Mineral water Perrier	Water	N
407pv1	Port wine	Alcohol	Y
408pv1	Rum	Alcohol	Y
409pv1	Sherry	Alcohol	Y
410pv1	Juice orange pasteurized	Juice	Y
411pv1	Mineral water Spa	Water	N
413pv1	Tomato juice	Juice	Y
414pv1	Soft drink tonic	Beverages	Y
415pv1	Vermouth	Alcohol	Y
416pv1	Brandy Dutch vieux	Alcohol	Y
417pv1	Juice drink	Beverages	Y
41pv1	Cabbage red raw	Fresh fruit & vegetables	N
420pv1	Mineral water Vittel	Water	N
421pv1	Whisky	Alcohol	Y
422pv1	Wine red	Alcohol	Y
423pv1	Wine white dry	Alcohol	Y
425pv1	Whey drink light Rivella	Beverages	Y
427pv1	Syrup apple	Bread toppings	Y
428pv1	Sauce barbecue	Sauces water based	Y
42pv1	Cabbage red boiled	Processed fruit & vegetables	N
430pv1	Cocoa powder	All other products	Y
431pv1	Chocolate milk	Snacks	Y
432pv1	Chocolate plain	Snacks	Y
433pv1	Chocolate flakes milk	Bread toppings	Y
434pv1	Chocolate butter	Bread toppings	Y
435pv1	Chocolate flakes plain	Bread toppings	Y
436pv1	Spread chocolate hazelnut	Bread toppings	Y
437pv1	Sauce cocktail/party/table 25% oil	Sauces emulsions	Y
439pv1	Gelatin	All other products	Y
43pv1	Cabbage Savoy raw	Fresh fruit & vegetables	N
440pv1	Ginger stem in syrup tinned	All other products	Y
441pv1	Yeast extract Marmite	Bread toppings	Y
442pv1	Coloured confetti fruit-flavoured	Bread toppings	Y
443pv1	Honey	Bread toppings	Y
444pv1	Spread chocolade plain	Bread toppings	Y
445pv1	Jam	Bread toppings	Y
446pv1	Chewing gum	Snacks	Y
447pv1	Chewing gum without sugar	Snacks	Y
449pv1	Coconut bread sweetened sliced	Bread toppings	Y
44pv1	Cabbage Savoy boiled	Processed fruit & vegetables	N
450pv1	Boiled sweets	Snacks	Y
451pv1	Mayonnaise	Sauces emulsions	Y
453pv1	Peppermint	Snacks	Y
454pv1	Piccalilly	Sauces emulsions	Y
455pv1	Peanut butter	Bread toppings	Y
457pv1	Jam rose hip	Bread toppings	Y
458pv1	Salad cream 25% oil	Sauces emulsions	Y
459pv1	Salad cream 50% oil Calve	Sauces emulsions	Y
461pv1	Toffees	Snacks	Y
462pv1	Ketchup tomato	Sauces water based	Y
463pv1	Fruit drink concentrate undiluted	Beverages	Y
465pv1	Sauce for chips 25% oil	Sauces emulsions	Y
466pv1	Sauce for chips 35% oil	Sauces emulsions	Y
467pv1	Pancake	Grains and cereals	Y
468pv1	Cream slice Dutch Tompouce	Snacks	Y
46pv1	Lettuce head raw	Fresh fruit & vegetables	N
474pv1	Doughnut Dutch style	Snacks	Y
475pv1.42857142857143	Liver chicken raw	Fresh meat	N
477pv1	Custard vanilla low fat	Milk products	Y
478pv1	Custard chocolate low fat	Milk products	Y
479pv1	Buttermilk with fruit	Milk products	Y
47pv1	Lettuce head boiled	Processed fruit & vegetables	N
47pv1.42857142857143	Lettuce head boiled	Processed fruit & vegetables	N
480pv1	Biscuit chocolate coated Chocoprins	Snacks	Y
481pv1	Biscuit shortbread Bastogne	Snacks	Y
482pv1	Sweets marshmellow type Spekkie	Snacks	Y
484pv1	Jam reduced sugar	Bread toppings	Y
485pv1	Ice cream dairy cornet	Snacks	Y
486pv1	Flan with fruit filling	Snacks	Y
487pv1	Candybar Mars	Snacks	Y
489pv1	Flan filled with rice pudding	Snacks	Y
48pv1	Swiss chard leaf boiled	Processed fruit & vegetables	N
497pv1	Fruit drink concentrate fruitmix	Beverages	Y
498pv1	Fruit drink conc Roosvicee Ferro	Beverages	Y
500pv1	Fruit drink conc Roosvicee Laxo	Beverages	Y
501pv1	Fruit drink conc Roosvicee Stop	Beverages	Y
511pv1	Cheese Edam 40+	Cheese -products	Y
512pv1	Cheese processed rindless 40+	Cheese -products	Y
513pv1	Cheese Gouda 48+ average	Cheese -products	Y
514pv1	Cheese 20+ Leidse w cumin/Fries clove	Cheese -products	Y
515pv1	Cheese spread 48+	Cheese -products	Y
516pv1	Cheese spread 40+	Cheese -products	Y
517pv1	Cheese spread 20+	Cheese -products	Y
51pv1	Spinach raw	Fresh fruit & vegetables	N
520pv1	Liquorice Dutch type salted	Snacks	Y
521pv1	Liquorice Dutch type double salted	Snacks	Y
522pv1	Liquorice Dutch type sweet	Snacks	Y
523pv1	Liquorice Stophoest	Snacks	Y
524pv1	M&M's chocolate	Snacks	Y
525pv1	Candybar Milky Way	Snacks	Y
526pv1	Candybar Bounty	Snacks	Y
528pv1	Candybar Snickers	Snacks	Y
52pv1	Spinach boiled	Processed fruit & vegetables	N
530pv1	Flour for pancakes	Grains and cereals	Y
532pv1	Blancmange chocolate	Milk products	Y
535pv1	Cocoa powder sweetened Benco	Beverages	Y
538pv1	Rhubarb puree w sugar	Fresh fruit & vegetables	N
539pv1	Sauce fruit for pudding	Sauces water based	Y
53pv1	Cabbage oxheart raw	Fresh fruit & vegetables	N
540pv1	Sauce chocolate for pudding	Sauces water based	Y
541pv1	Peanut butter with nut pieces	Bread toppings	Y
546pv1	Peanuts coated	All other products	Y
548pv1	Sauce tomato based shashlik	Sauces water based	Y
549pv1	Sauce curry 25% oil	Meal sauces	Y
54pv1	Cabbage oxheart boiled	Processed fruit & vegetables	N
553pv1	Salad dressing 40% oil Becel	Sauces emulsions	Y
554pv1	Coffee creamer powder Licht en Romig	Milk products	Y
555pv1	Topping dessert w sugar whipped KlopKlop	Milk products	Y
556pv1	Cheese Camembert 45+	Cheese -products	Y
557pv1	Celery raw	Fresh fruit & vegetables	N
558pv1	Celeriac raw	Fresh fruit & vegetables	N
55pv1	Brussel sprouts boiled	Processed fruit & vegetables	N
562pv1	Leek raw	Fresh fruit & vegetables	N
565pv1	Toast	Bread	Y
566pv1	Sausage frankfurter tinned	Processed meat products	Y
567pv1	Sausage luncheon meat	Processed meat products	Y
568pv1	Black pudding	Processed meat products	Y
568pv1.25	Black pudding	Processed meat products	Y
570pv1	Candybar Nuts	Snacks	Y
574pv1	Sandwich spread cucumber	Bread toppings	Y
575pv1	Sandwich spread original	Bread toppings	Y
57pv1	Sweetcorn boiled	Processed fruit & vegetables	N
583pv1	Ketchup hot	Sauces water based	Y
584pv1	Ketchup curry	Sauces water based	Y
58pv1	Bean sprouts raw	Fresh fruit & vegetables	N
590pv1	Wheat bran	Grains and cereals	Y
591pv1	Breakfast cereal All-Bran Plus Kellogg's	Breakfast cereals	Y
593pv1	Cheese Brie 50+	Cheese -products	Y
595pv1	Cocoa product powder Ovomaltine	Beverages	Y
596pv1	Crispbread gold-brown	Bread	Y
59pv1	Bean sprouts boiled	Processed fruit & vegetables	N
601pv1	Oil olive	Oils, fats & fat spreads	N
602pv1	Salmon tinned	Processed fish products	Y
603pv1	Eel smoked	Processed fish products	Y
605pv1	Porridge barley with raisins Bessola	Milk products	Y
606pv1	Oil Becel	Oils, fats & fat spreads	Y
607pv1	Oil safflower	Oils, fats & fat spreads	N
608pv1	Oil corn germ	Oils, fats & fat spreads	N
610pv1	Chinese noodle ball deep-fried	Processed meat products	Y
612pv1	Sauce tomato based with 15% oil	Sauces emulsions	Y
616pv1	Peanut sauce jar prepared	Meal sauces	Y
618pv1	Cocktail snacks Nibbits	Snacks	Y
619pv1	Cocktail snacks Wokkels	Snacks	Y
620pv1	Crisps potato straws average	Snacks	Y
621pv1	M&M's chocolate with peanuts	Snacks	Y
630pv1	Popcorn puffed natural	Snacks	Y
633pv1	Meringue cake Bokkenpootje	Snacks	Y
634pv1	Coconut flavoured cookies	Snacks	Y
635pv1	Biscuits Dutch krakeling	Snacks	Y
636pv1	Biscuit muesli	Snacks	Y
638pv1	Salami sausage saveloy	Processed meat products	Y
639pv1	Bacon rashers streaky	Processed meat products	Y
639pv1.25	Bacon rashers streaky	Processed meat products	Y
639pv1.42857142857143	Bacon rashers streaky	Processed meat products	Y
639pv1.66666666666667	Bacon rashers streaky	Processed meat products	Y
63pv1	Onions raw	Fresh fruit & vegetables	N
640pv1	Liver sausage	Processed meat products	Y
641pv1	Bacon	Processed meat products	Y
641pv1.66666666666667	Bacon	Processed meat products	Y
642pv1	Pate	Processed meat products	Y
643pv1	Pork side cured and smoked	Processed meat products	Y
643pv1.05263157894737	Pork side cured and smoked	Processed meat products	Y
644pv1	Coffee prepared	Beverages	Y
645pv1	Tea prepared	Beverages	Y
646pv1	Spaghetti Bolognese frozen	Main Dish	Y
64pv1	Onions boiled	Processed fruit & vegetables	N
650pv1	Cabbage red w apple pieces frozen boiled	Processed fruit & vegetables	Y
651pv1	Spinach creamed frozen boiled	Processed fruit & vegetables	Y
653pv1	Breakfast cereal Rice Krispies Kellogg's	Breakfast cereals	Y
654pv1	Cheese cottage	Cheese -products	Y
655pv1	Crispbakes Dutch wholemeal	Bread	Y
657pv1	Yoghurt drink	Milk products	Y
658pv1	Rice white boiled	Processed potatoe, pasta, rice	N
659pv1	Pasta plain average boiled	Processed potatoe, pasta, rice	Y
65pv1	Lettuce lambs raw	Fresh fruit & vegetables	N
660pv1	Beans brown tinned	Processed fruit & vegetables	Y
664pv1	Juice grapefruit	Juice	Y
673pv1.2987012987013	Mustard leaf raw	Fresh fruit & vegetables	N
67pv1	Chicory raw	Fresh fruit & vegetables	N
680pv1.05263157894737	Okra raw	Fresh fruit & vegetables	N
684pv1	Tannia leaves raw	Fresh fruit & vegetables	N
687pv1	Tahoe soya curd	Snacks	Y
688pv1	Tempeh fermented soya beans	Processed meat products	Y
689pv1	Avocado	Fresh fruit & vegetables	N
689pv1.01010101010101	Avocado	Fresh fruit & vegetables	N
68pv1	Chicory boiled	Processed fruit & vegetables	N
692pv1	Mango	Fresh fruit & vegetables	N
693pv1	Papaya	Fresh fruit & vegetables	N
696pv1	Flour maize	Grains and cereals	Y
69pv1	Cabbage white raw	Fresh fruit & vegetables	N
704pv1	Shrimp paste trassie	Sauces water based	Y
70pv1	Cabbage white cooked	Processed fruit & vegetables	N
713pv1	Waffle syrup average	Snacks	Y
714pv1	Cheese Roquefort	Cheese -products	Y
715pv1	Cheese cream 60+	Cheese -products	Y
716pv1	Cheese Saint Paulin/Port Salut	Cheese -products	Y
717pv1	Chocolate bar milk with nuts	Snacks	Y
718pv1	Cheese Parmesan	Cheese -products	Y
719pv1	Cheese cream soft Mon Chou	Cheese -products	Y
71pv1	Carrots raw average	Fresh fruit & vegetables	N
721pv1	Cheese Limburger	Cheese -products	Y
722pv1	Cheese Gruyere	Cheese -products	Y
724pv1	Cheese Emmenthaler	Cheese -products	Y
725pv1	Cheese Cheddar	Cheese -products	Y
726pv1	Cheese Bluefort	Cheese -products	Y
727pv1	Chocolate liqueurs	Snacks	Y
728pv1	Cheese cream soft Boursin	Cheese -products	Y
729pv1	Mayonnaise low fat 40% oil	Sauces emulsions	Y
72pv1	Carrots boiled average	Processed fruit & vegetables	N
736pv1	Pudding vanilla	Milk products	Y
738pv1	Fruit drink conc Roosvicee Dieet	Beverages	Y
73pv1	Cabbage sauerkraut raw	Processed fruit & vegetables	Y
747pv1	Mineral water average	Beverages	Y
74pv1	Cabbage sauerkraut cooked	Processed fruit & vegetables	Y
750pv1	Marsh mellows	Snacks	Y
751pv1	Liquorice allsorts	Snacks	Y
752pv1	Wine gums	Snacks	Y
757pv1	Soup clear with vegetables and noodles	Soups	Y
758pv1	Soup clear with meat	Soups	Y
759pv1	Soup clear with vegetables	Soups	Y
75pv1	Vegetable mix for soup raw	Fresh fruit & vegetables	N
75pv1.17647058823529	Vegetable mix for soup raw	Fresh fruit & vegetables	N
760pv1	Soup clear with meat and noodles	Soups	Y
761pv1	Soup clear with meat and vegetables	Soups	Y
762pv1	Soup clear w meat vegetables and noodles	Soups	Y
763pv1	Soup thickened w vegetables	Soups	Y
764pv1	Soup thickened w meat	Soups	Y
765pv1	Soup main course w legumes without meat	Soups	Y
766pv1	Soup main course w legumes and meat	Soups	Y
767pv1	Mousse chocolate	Milk products	Y
76pv1	Modular protein powder Protifar Plus	All other products	Y
782pv1	Sausage spiced and smoked	Processed meat products	Y
783pv1	Sausage with smoked bacon-bits	Processed meat products	Y
784pv1	Ham lean boiled	Processed meat products	Y
785pv1	Ham shoulder medium fat boiled	Processed meat products	Y
786pv1	Pudding chipolata	Milk products	Y
789pv1	Cake butter Dutch Boterkoek	Snacks	Y
78pv1	Semolina	Grains and cereals	Y
790pv1	Almond paste with egg	All other products	Y
791pv1	Soup clear with noodles	Soups	Y
792pv1	Soup thickened w meat and vegetables	Soups	Y
797pv1	Soup vegetable based dried packet prep	Soups	Y
798pv1	Soup meat based dried packet prepared	Soups	Y
799pv1	Soup legume based dried packet prepared	Soups	Y
7pv1	Endive raw	Fresh fruit & vegetables	N
800pv1	Soup vegetable based tinned prepared	Soups	Y
801pv1	Soup meat based ready made prepared	Soups	Y
802pv1	Soup legume based ready made prepared	Soups	Y
803pv1	Soup main course canned prepared	Soups	Y
804pv1	Cheese sheep fresh	Cheese -products	Y
805pv1	Jagermeister herb liquor	Alcohol	Y
807pv1	Jam without sugar	Bread toppings	Y
80pv1	Flour rice	Grains and cereals	Y
810pv1	Beef steak tartare spiced filet americ	Processed meat products	Y
812pv1	Cream sour	Milk products	Y
814pv1	Fish fingers fried	Processed fish products	Y
815pv1.11111111111111	Fish fingers unprepared	Processed fish products	Y
818pv1	White fish fillet in batter deep-fried	Processed fish products	Y
819pv1	Cod boiled	Processed fish products	Y
820pv1	Cod raw	Fresh fish	N
824pv1	Mustard	Sauces emulsions	Y
830pv1	Garlic fresh	Fresh fruit & vegetables	N
830pv1.17647058823529	Garlic fresh	Fresh fruit & vegetables	N
832pv1	Ginger root fresh	Sauces water based	Y
833pv1	Appel strudel	Snacks	Y
835pv1	Cheesecake made with fromage frais	Snacks	Y
836pv1	Shortbread	Snacks	Y
837pv1	Biscuit oatmeal	Breakfast cereals	Y
838pv1	Sesame seeds	All other products	N
83pv1	Eggs chicken whole raw average	Fresh meat	N
844pv1	Salad dressing naturel without oil	Sauces emulsions	Y
845pv1	Candybar Twix	Snacks	Y
849pv1	Fennel raw	Sauces water based	Y
84pv1	Eggs chicken boiled average	Processed meat products	Y
850pv1	Vegetables mixed pickled Atjar tjampoer	Processed fruit & vegetables	Y
851pv1	Sweet pepper sweet/sour pickled	Processed fruit & vegetables	Y
854pv1	Gateau fatless sponge w fruit & cream	Snacks	Y
855pv1	Biscuit spiced Speculaas w almnd paste	Snacks	Y
85pv1	Eggs chicken yolk raw	Fresh meat	N
861pv1	Juice beetroot	Juice	Y
862pv1	Milkshake	Snacks	Y
863pv1	Yoghurt full fat with fruit	Milk products	Y
866pv1	Sweets fruit pectinbased	Snacks	Y
867pv1	Linseeds	All other products	N
869pv1	Flour soya full fat	Grains and cereals	Y
86pv1	Egg yolk chicken boiled	Processed meat products	Y
870pv1	Milk soya average	Milk products	N
871pv1	Miso soya paste	Sauces water based	Y
872pv1	Sunflower seeds	All other products	N
873pv1	Biscuit fortifd w currants LigaEvergreen	Snacks	Y
875pv1	Apple with skin average	Fresh fruit & vegetables	N
875pv1.11111111111111	Apple with skin average	Fresh fruit & vegetables	N
875pv1.17647058823529	Apple with skin average	Fresh fruit & vegetables	N
876pv1	Peanuts salted	All other products	Y
878pv1	Croissants	Bread	Y
879pv1	Butter salted	Oils, fats & fat spreads	Y
881pv1	Cheese 48+ low salt	Cheese -products	Y
882pv1	Cheese Kernhem 60+	Cheese -products	Y
883pv1	Cheese Amsterdam 48+	Cheese -products	Y
884pv1	Sweet pepper red raw	Fresh fruit & vegetables	N
885pv1	Sweet pepper red boiled	Processed fruit & vegetables	N
892pv1	Pizza mini frozen McCain	Snacks	Y
8pv1	Endive boiled	Processed fruit & vegetables	N
901pv1	Snack sausage roll w bread dough pastry	Snacks	Y
912pv1	Pudding raspberries w currant sauce	Milk products	Y
915pv1	Chocolate pudding with sauce	Milk products	Y
917pv1	Fromage frais half fat w fruit	Milk products	Y
918pv1	Plaice boiled	Processed fish products	Y
919pv1	Pollack boiled	Processed fish products	Y
920pv1	Broccoli boiled	Processed fruit & vegetables	N
921pv1	Broccoli raw	Fresh fruit & vegetables	N
922pv1	Courgettes raw	Fresh fruit & vegetables	N
923pv1	Juice pear	Juice	Y
925pv1	Cake Dutch spiced Ontbijtkoek wholemeal	Snacks	Y
929pv1	Chocolate bar milk without sugar	Snacks	Y
931pv1	Fromage frais low fat with fruit	Milk products	Y
933pv1	Blancmange caramel	Milk products	Y
938pv1	Pudding semolina with red currant sauce	Milk products	Y
940pv1	Blancmange vanilla w strawberry sauce	Milk products	Y
943pv1	Croquette meat Bitterbal prep in oven	Processed meat products	Y
944pv1	Croquette meat ragout prepared in oven	Processed meat products	Y
948pv1	Rosti prepared without fat	Processed potatoe, pasta, rice	Y
951pv1	Beans French boiled	Processed fruit & vegetables	N
952pv1	Kale curly frozen boiled	Processed fruit & vegetables	Y
953pv1	Peas frozen boiled	Processed fruit & vegetables	N
954pv1	Beans French frozen boiled	Processed fruit & vegetables	N
957pv1	Asparagus boiled	Processed fruit & vegetables	N
958pv1	Beetroot boiled	Processed fruit & vegetables	N
95pv1.42857142857143	Horsemeat raw	Fresh meat	N
95pv1.53846153846154	Horsemeat raw	Fresh meat	N
960pv1	Salsify boiled	Processed fruit & vegetables	N
961pv1	Beans runner boiled	Processed fruit & vegetables	N
962pv1	Beans broad boiled	Processed fruit & vegetables	N
963pv1	Peas fresh boiled	Processed fruit & vegetables	N
964pv1	Mange-tout boiled	Processed fruit & vegetables	N
966pv1	Courgettes boiled	Processed fruit & vegetables	N
967pv1	Fennel boiled	Processed fruit & vegetables	N
968pv1	Beans white/brown boiled	Processed fruit & vegetables	N
971pv1	Beans soya boiled	Processed fruit & vegetables	N
972pv1	Peas green boiled	Processed fruit & vegetables	N
975pv1	Crispbread sesame	Bread	Y
976pv1	Crispbread light	Bread	Y
982pv1	Potatoes wo skins boiled average	Processed potatoe, pasta, rice	N
99pv1.42857142857143	Mutton >10g fat raw av	Fresh meat	N
